## RESEARCH ARTICLE

# Nitrogen and potassium application effects on productivity, profitability and nutrient use efficiency of irrigated wheat (*Triticum aestivum* L.)

Sandeep Sharma<sup>1\*</sup>, Gagandeep Kaur<sup>2</sup>, Pritpal Singh<sup>1</sup>, Saud Alamri<sup>3</sup>, Ritesh Kumar<sup>4</sup>, Manzer H. Siddiqui<sup>3\*</sup>

**1** Department of Soil Science, Punjab Agricultural University, Ludhiana, India, **2** Yadindra Department of Engineering, Punjabi University South Campus, Talwandi Sabo, Bathinda, Punjab, India, **3** Department of Botany and Microbiology, College of Science, King Saud University, Riyadh, Saudi Arabia, **4** Department of Agronomy, Kansas State University, 2004 Throckmorton Plant Science Center, Manhattan, KS, United States of America

\* [sandyagro@pau.edu](mailto:sandyagro@pau.edu) (SS); [mhsiddiqui@ksu.edu.sa](mailto:mhsiddiqui@ksu.edu.sa) (MHS)

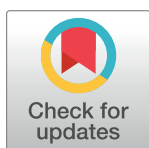

## OPEN ACCESS

**Citation:** Sharma S, Kaur G, Singh P, Alamri S, Kumar R, Siddiqui MH (2022) Nitrogen and potassium application effects on productivity, profitability and nutrient use efficiency of irrigated wheat (*Triticum aestivum* L.). PLoS ONE 17(5): e0264210. <https://doi.org/10.1371/journal.pone.0264210>

**Editor:** Humaira Yasmin, COMSATS University Islamabad (CUI), PAKISTAN

**Received:** December 6, 2021

**Accepted:** February 5, 2022

**Published:** May 24, 2022

**Copyright:** © 2022 Sharma et al. This is an open access article distributed under the terms of the [Creative Commons Attribution License](https://creativecommons.org/licenses/by/4.0/), which permits unrestricted use, distribution, and reproduction in any medium, provided the original author and source are credited.

**Data Availability Statement:** All relevant data are within the paper.

**Funding:** Researchers Supporting Project number (RSP- 2021/347), King Saud University, Riyadh, Saudi Arabia

**Competing interests:** The authors have declared that no competing interests exist.

## Abstract

The development of robust nutrient management strategies have played a crucial role in improving crop productivity, profitability and nutrient use efficiency. Therefore, the implementation of efficient nutrient management strategies is important for food security and environmental safety. Amongst the essential plant nutrients, managing nitrogen (N) and potassium (K) in wheat (*Triticum aestivum* L.) based production systems is critically important to maximize profitable production with minimal negative environmental impacts. We investigated the effects of different fertilizer-N (viz. 0–240 kg N ha<sup>-1</sup>; N<sub>0</sub>–N<sub>240</sub>) and fertilizer-K (viz. 0–90 kg K ha<sup>-1</sup>; K<sub>0</sub>–K<sub>90</sub>) application rates on wheat productivity, nutrient (N and K) use efficiency viz. partial factor productivity (PFP<sub>N/K</sub>), agronomic efficiency (AE<sub>N/K</sub>), physiological efficiency (PE<sub>N/K</sub>), reciprocal internal use efficiency (RIUE<sub>N/K</sub>), and profitability in terms of benefit-cost (B-C) ratio, gross returns above fertilizer cost (GRAFC) and the returns on investment (ROI) on fertilizer application. These results revealed that wheat productivity, plant growth and yield attributes, nutrients uptake and use efficiency increased significantly ( $p < 0.05$ ) with fertilizer-N application, although the interaction effect of N x K application was statistically non-significant ( $p < 0.05$ ). Fertilizer-N application at 120 kg N ha<sup>-1</sup> (N<sub>120</sub>) increased the number of effective tillers (8.7%), grain yield (17.3%), straw yield (15.1%), total N uptake (25.1%) and total K uptake (16.1%) than the N<sub>80</sub>. Fertilizer-N application significantly increased the SPAD reading by ~4.2–10.6% with fertilizer-N application (N<sub>80</sub>–N<sub>240</sub>), compared with N<sub>0</sub>. The PFP<sub>N</sub> and PFP<sub>K</sub> increased significantly with fertilizer-N and K application in wheat. The AE<sub>N</sub> varied between 12.3 and 22.2 kg kg<sup>-1</sup> with significantly higher value of 20.8 kg kg<sup>-1</sup> in N<sub>120</sub>. Fertilizer-N application at higher rate (N<sub>160</sub>) significantly decreased the AE<sub>N</sub> by ~16.3% over N<sub>120</sub>. The N<sub>120</sub> treatment increased the AE<sub>K</sub> by ~52.6% than N<sub>80</sub> treatment. Similarly the RIUE<sub>N</sub> varied between 10.6 and 25.6 kg Mg<sup>-1</sup> grain yield, and increased significantly by ~80.2% with N<sub>120</sub> as compared to N<sub>0</sub> treatment. The RIUE<sub>K</sub> varied between 109 and 15.1 kg Mg<sup>-1</sup> grain yield, and was significantly higher in N<sub>120</sub>.

treatment. The significant increase in mean gross returns (MGRs) by ~17.3% and mean net returns (MNRs) by ~24.1% increased the B-C ratio by ~15.1% with N<sub>120</sub> than the N<sub>80</sub> treatment. Fertilizer-N application in N<sub>120</sub> treatment increased the economic efficiency of wheat by ~24.1% and GRAFC by ~16.9%. Grain yield was significantly correlated with total N uptake ( $r = 0.932^{**}$ ,  $p < 0.01$ ), K uptake ( $r = 0.851^{**}$ ), SPAD value ( $r = 0.945^{**}$ ), green seeker reading ( $r = 0.956^{**}$ ), and the RIUE<sub>N</sub> ( $r = 0.910^{**}$ ). The artificial neural networks (ANNs) showed highly satisfactory performance in training and simulation of testing data-set on wheat grain yield. The calculated mean absolute error (MAE), mean absolute percentage error (MAPE) and root mean square error (RMSE) for wheat were 0.0087, 0.834 and 0.052, respectively. The well trained ANNs model was capable of producing consistency for the training and testing correlation ( $R^2 = 0.994^{**}$ ,  $p < 0.01$ ) between the predicted and actual values of wheat grain yield, which implies that ANN model succeeded in wheat grain yield prediction.

## 1. Introduction

Wheat (*Triticum aestivum* L.) is extensively utilized in human consumption and has high rank globally among the most essential cereals grown worldwide. It accounts for ~30% of all cereal food worldwide and staple food for ~10 billion people in ~43 countries of the world [1, 2]. The most important factors influencing the wheat grain quality parameters are the environment, genotype and the potential interactions among these factors [3, 4]. Nitrogen is most important yield limiting nutrients for crop growth in different agro-ecological regions. Fertilizer-N affect the physiological (i.e. respiration rate, water balance, signaling pathways) [5] and metabolic (i.e. enzyme activity, photosynthesis rate) processes of plants, which influencing plant growth [6, 7]. Research on N fertilization to cereal crops has been well highlighted because of its essential role in high yielding systems [8–10], improved dough quality and the potential for environmental impacts due to low N use efficiency [10, 11].

After N, potassium (K) is absorbed in large amount than any other element [12] and plays a lead role in increasing crop yield and improving the product quality [13, 14]. Potassium supply is considered as a limiting factor, given its high accumulation in cereals [15, 16]. Fertilizer-K application is required for plant survival, carbohydrate and proteins syntheses, cell evolution which helps in maintaining the ionic cell balance and acts as an enzyme activator besides activating the photosynthetic enzymes, assimilates translocation [17, 18] and enhance stress tolerance [19, 20]. Potassium effectively coordinates the relationship between source and sink of starch synthesis and transport and transformation of photosynthates [21]. But, imbalanced fertilizer application in crop production has become common in many developing countries [10, 22, 23]. The practice often leads to an excess of fertilizer-N application with a serious environmental implications [24], besides continual depletion of soil K mainly due to inadequate K supply [22]. Over application of fertilizer-N leads to enrichment of reactive N constituents, transformation of soil N forms and also affects soil acidification, with resultant impairment of ecosystems [24, 25]. Bijay-Singh et al. [26] reported that to a large percentage of area under rice-wheat system, very little or no fertilizer-K is being applied and therefore, most of it comes from K-reserves of the soil. There are many causes of low K use in farmers' fields, such as the effect of K in vegetative crop growth is not very clear, K fertilizer are more costly than fertilizer-N, and sometimes it is not available in the local market [27].

The apparent recovery of nutrients from applied fertilizers for cereal crops is typically low [28, 29]. Recent evidence suggests that the co-application of fertilizers (P, K and S) can improve the recovery of fertilizer-N and increased N efficiency [30]. The causes of yield gaps due to nutrient deficiencies and imbalances among regions can be enhanced yields ~20–30%, by management practices [31]. Therefore, a better characterization of wheat response to fertilizer application and interactions among nutrients is essential for sustainable improvements in yield [32]. While extensive research has explored the wheat response to fertilizer-N, P, and K over the years, but with few exceptions [33, 34] most studies were usually limited in geography [35, 36] or on temporal scale [36, 37]. Fertilizer-N application intensifies K requirement of crops due to yield gain benefits, therefore, high K application rates become essential to achieve higher crop yields [38]. Contrarily, increasing fertilizer-N application to crops with insufficient soil K status could increase K recycling from the deep layers. Therefore, the fertilizer-N and K application rates must be adjusted to optimize and rationalize crop demand and reduce the negative impacts on soils' K reserves due to high K mining [39].

While extensive research has explored wheat crop response to fertilizer-N, P, and K over the years [36, 37] but provided a limited potential to extrapolate the interactive effect of N and K on wheat yield and nutrient use efficiency. Additionally, despite potential interaction effects of fertilizer rates (N, P, and K) on crop's responses [38], most studies focused on one nutrients at a time [30, 39], and very few studies attempted to explore the interaction effects among fertilizer-N, and K applications [33]. Wheat yield response to fertilizer-K depends on the N nutrition level and the interaction is usually positive [40]. Nonetheless, fertilizer-K application facilitates the absorption and transport of nitrate-N ( $\text{NO}_3^-$ -N) to the shoots of the plant and transports it later on to the aerial plant parts, which in turn increases the activities of N [41, 42]. The availability and proper ratio in the soil are important factors for plant growth and development [38]. In addition, changes in  $\text{NH}_4^+/\text{NO}_3^-$  ratios and K supply levels influence the yield and nutrient uptake of wheat [43]. Therefore, interaction effect of fertilizer-N and K can be assessed by with wide range of fertilizer application rates of two or more nutrients on nutrient uptake, yield and nutrient use efficiency. A better understanding of fertilizer-N and -K interactions affecting crop yield and nutrient use efficiency has important agronomic consequences in economic and environmental context. Therefore, the objective of this field experiment was to investigate fertilizer-N by K interaction in wheat by evaluating the effects of wide range of fertilizer-N and K applications in different combinations on yield, nutrient use efficiency and economic indices in irrigated sandy loam ellitic soil in north-western India.

## 2. Results

### 2.1. Yield attributes and crop productivity

Fertilizer-N application significantly ( $p < 0.05$ ) increased the number of effective tillers and non-effective tillers during 2 study years, while fertilizer-K application did not increased the number of effective tillers of wheat (Table 1). Data pooled for study years showed that  $\text{N}_{160}$  increased the number of effective tillers by ~3.4-times, compared with the  $\text{N}_0$ . Similarly,  $\text{N}_{160}$  increased the number of non-effective tillers significantly over the  $\text{N}_0$ . At higher fertilizer-N applications, the number of effective and non-effective tillers did not increased significantly. The plant height and spike length did not increased significantly with fertilizer-N and K application. The root dry weight increased significantly by  $25.6 \text{ g plant}^{-1}$  (~164%) with  $\text{N}_{120}$  compared with  $\text{N}_0$ . The interaction effect of fertilizer-N and K application on yield attributes of wheat was statistically non-significant. Fertilizer-N application increased the root dry weight up to fertilizer-N application rate of  $120 \text{ kg N ha}^{-1}$ , and thereafter there was no change in the root dry weight (Fig 1). The relationship between fertilizer-N application rates and root dry

**Table 1. Effect of nitrogen (N) and potassium (K) application on yield attributes viz. number of effective tillers, number of non-effective tillers, plant height, spike length and root dry weight of wheat (*Triticum aestivum* L.) in a sandy loam soil in sub-tropical India.**

| Treatment                 | Effective tillers (No. 2m <sup>-1</sup> row length) |      |        | Non-effective tillers (No. 2m <sup>-1</sup> row length) |      |        | Plant height (cm) |       |        | Spike length (cm) |      |        | Root dry weight (g plant <sup>-1</sup> ) |      |        |
|---------------------------|-----------------------------------------------------|------|--------|---------------------------------------------------------|------|--------|-------------------|-------|--------|-------------------|------|--------|------------------------------------------|------|--------|
|                           | 2012                                                | 2013 | Pooled | 2012                                                    | 2013 | Pooled | 2012              | 2013  | Pooled | 2012              | 2013 | Pooled | 2012                                     | 2013 | Pooled |
| Main plot (N application) |                                                     |      |        |                                                         |      |        |                   |       |        |                   |      |        |                                          |      |        |
| N <sub>0</sub>            | 55                                                  | 59   | 57     | 11.7                                                    | 14.2 | 12.9   | 70.7              | 66.8  | 68.2   | 6.9               | 7.1  | 6.9    | 16.5                                     | 14.4 | 15.6   |
| N <sub>80</sub>           | 170                                                 | 175  | 172    | 22.3                                                    | 24.7 | 23.1   | 90.1              | 92.7  | 91.2   | 9.1               | 8.6  | 8.8    | 38.1                                     | 40.2 | 38.8   |
| N <sub>120</sub>          | 184                                                 | 193  | 187    | 22.5                                                    | 25.9 | 24.1   | 107.1             | 104.5 | 105.4  | 9.3               | 8.9  | 9.1    | 39.4                                     | 42.5 | 41.2   |
| N <sub>160</sub>          | 190                                                 | 199  | 194    | 25.2                                                    | 28.7 | 26.7   | 104.5             | 108.6 | 106.2  | 8.9               | 9.2  | 9.0    | 40.3                                     | 43.2 | 41.9   |
| N <sub>200</sub>          | 203                                                 | 210  | 207    | 26.3                                                    | 30.2 | 27.9   | 105.5             | 107.6 | 106.2  | 9.0               | 9.4  | 9.2    | 41.2                                     | 42.9 | 42.1   |
| N <sub>240</sub>          | 207                                                 | 213  | 210    | 27.6                                                    | 31.4 | 28.8   | 107.5             | 111.2 | 108.4  | 9.2               | 9.6  | 9.4    | 42.0                                     | 44.7 | 43.5   |
| LSD ( <i>p</i> <0.05)     | 18.4                                                | 19.1 | 18.7   | 3.7                                                     | 1.8  | 1.9    | NS                | NS    | NS     | NS                | NS   | NS     | 3.1                                      | 3.4  | 3.2    |
| Sub-plot (K application)  |                                                     |      |        |                                                         |      |        |                   |       |        |                   |      |        |                                          |      |        |
| K <sub>0</sub>            | 165                                                 | 172  | 167    | 22.0                                                    | 24.1 | 23.1   | 96.8              | 93.9  | 94.5   | 9.3               | 8.7  | 9.1    | 36.5                                     | 34.7 | 35.4   |
| K <sub>30</sub>           | 171                                                 | 181  | 175    | 23.0                                                    | 25.7 | 24.6   | 97.6              | 99.5  | 98.3   | 8.2               | 8.7  | 8.5    | 36.1                                     | 38.4 | 37.3   |
| K <sub>60</sub>           | 169                                                 | 179  | 173    | 22.6                                                    | 26.4 | 25.6   | 99.4              | 102.4 | 101.2  | 9.5               | 8.9  | 9.2    | 36.3                                     | 38.9 | 37.4   |
| K <sub>90</sub>           | 168                                                 | 179  | 174    | 22.7                                                    | 26.8 | 26.1   | 100.1             | 103.8 | 102.4  | 8.2               | 8.9  | 8.6    | 36.2                                     | 38.5 | 37.6   |
| LSD ( <i>p</i> <0.05)     | NS                                                  | NS   | NS     | NS                                                      | NS   | NS     | NS                | NS    | NS     | NS                | NS   | NS     | NS                                       | NS   | NS     |

<https://doi.org/10.1371/journal.pone.0264210.t001>

weight of wheat could best be expressed as Eq 1.

$$\begin{aligned} &\text{Root dry weight (g plant}^{-1}\text{)} \\ &= -0.0001 (\text{Fertilizer-N, kg N ha}^{-1})^2 + 0.302 (\text{Fertilizer-N, kg N ha}^{-1}) + 16.74, R^2 \\ &= 0.959 \end{aligned} \quad (1)$$

Wheat grain yield increased significantly up to N<sub>120</sub> during 2014, while in 2013 the significant increase was observed up to N<sub>160</sub> (Table 2). Data pooled for two years showed that wheat grain yield was increased by 2.5 Mg ha<sup>-1</sup> (~76.5%) with N<sub>120</sub>, compared with N<sub>0</sub>. Similarly, straw yield did not increased significantly with N<sub>160</sub> than the N<sub>120</sub>. The fertilizer-N and K

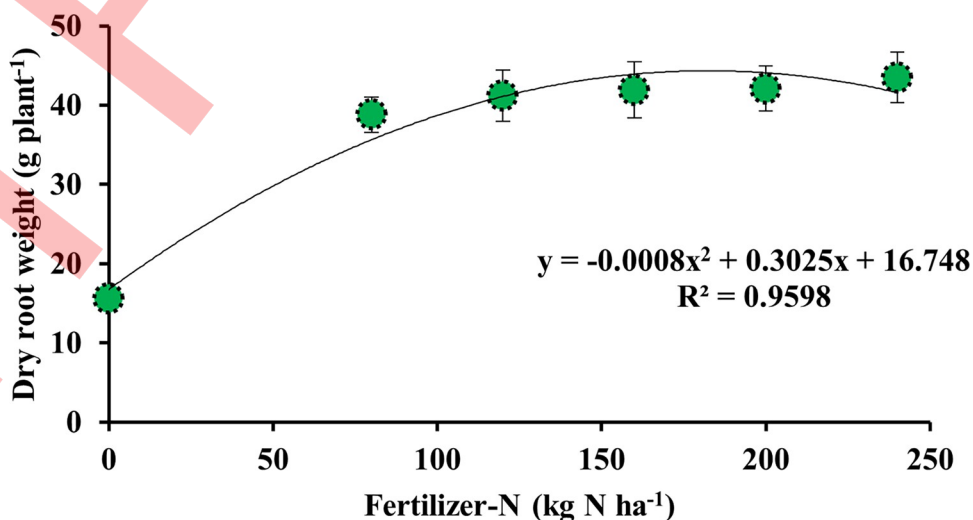

**Fig 1. Relationship between fertilizer-N application rate (kg N ha<sup>-1</sup>) and dry root weight (g plant<sup>-1</sup>) of wheat (*Triticum aestivum* L.) in a sandy loam soil. Line bars indicate standard error from mean (S.E.<sub>M</sub>).**

<https://doi.org/10.1371/journal.pone.0264210.g001>

Table 2. Effect of nitrogen (N) and potassium (K) application on wheat grain, straw yield (Mg ha<sup>-1</sup>) and harvest index in a sandy loam soil in sub-tropical India.

| Treatment                 | Grain yield (Mg ha <sup>-1</sup> ) |      |        | Straw yield (Mg ha <sup>-1</sup> ) |      |        | Harvest index (HI) |      |        |
|---------------------------|------------------------------------|------|--------|------------------------------------|------|--------|--------------------|------|--------|
|                           | 2012                               | 2013 | Pooled | 2012                               | 2013 | Pooled | 2012               | 2013 | Pooled |
| Main plot (N application) |                                    |      |        |                                    |      |        |                    |      |        |
| N <sub>0</sub>            | 3.28                               | 3.26 | 3.27   | 3.61                               | 3.32 | 3.47   | 0.48               | 0.50 | 0.49   |
| N <sub>80</sub>           | 5.05                               | 4.79 | 4.92   | 6.57                               | 6.15 | 5.74   | 0.43               | 0.44 | 0.46   |
| N <sub>120</sub>          | 5.67                               | 5.87 | 5.77   | 7.43                               | 6.78 | 6.60   | 0.43               | 0.46 | 0.47   |
| N <sub>160</sub>          | 5.57                               | 6.55 | 6.06   | 7.39                               | 6.79 | 6.73   | 0.43               | 0.49 | 0.47   |
| N <sub>200</sub>          | 5.57                               | 6.78 | 6.17   | 7.71                               | 7.17 | 6.94   | 0.42               | 0.49 | 0.47   |
| N <sub>240</sub>          | 5.44                               | 7.00 | 6.22   | 7.61                               | 7.54 | 6.92   | 0.42               | 0.48 | 0.47   |
| LSD ( <i>p</i> <0.05)     | 0.59                               | 0.31 | 0.30   | 0.61                               | 0.80 | 0.74   | NS                 | NS   | NS     |
| Sub-plot (K application)  |                                    |      |        |                                    |      |        |                    |      |        |
| K <sub>0</sub>            | 5.25                               | 6.30 | 5.78   | 7.03                               | 6.87 | 6.40   | 0.43               | 0.48 | 0.47   |
| K <sub>30</sub>           | 5.44                               | 6.10 | 5.77   | 7.28                               | 6.72 | 6.53   | 0.43               | 0.48 | 0.47   |
| K <sub>60</sub>           | 5.53                               | 6.21 | 5.87   | 7.45                               | 6.91 | 6.66   | 0.43               | 0.47 | 0.47   |
| K <sub>90</sub>           | 5.61                               | 6.17 | 5.89   | 7.61                               | 7.04 | 6.75   | 0.42               | 0.47 | 0.47   |
| LSD ( <i>p</i> <0.05)     | NS                                 | NS   | NS     | 0.34                               | 0.35 | 0.34   | NS                 | NS   | NS     |

<https://doi.org/10.1371/journal.pone.0264210.t002>

application did not significantly increase the harvest index of wheat. The interaction effect of fertilizer-N and K on wheat grain and the harvest index was non-significant. Fertilizer-K application at K<sub>90</sub> resulted in significant increase in wheat straw yield. Fig 2 illustrates that wheat grain yield increased in non-linear way with fertilizer-N application, and the relationship between fertilizer-N application rates and wheat grain yield could best be described by Eq 2.

Wheat grain yield (Mg ha<sup>-1</sup>)

$$= -6E-05 (\text{Fertilizer-N, kg N ha}^{-1})^2 + 0.027 (\text{Fertilizer-N, kg N ha}^{-1}) + 3.244, R^2 = 0.994 \quad (2)$$

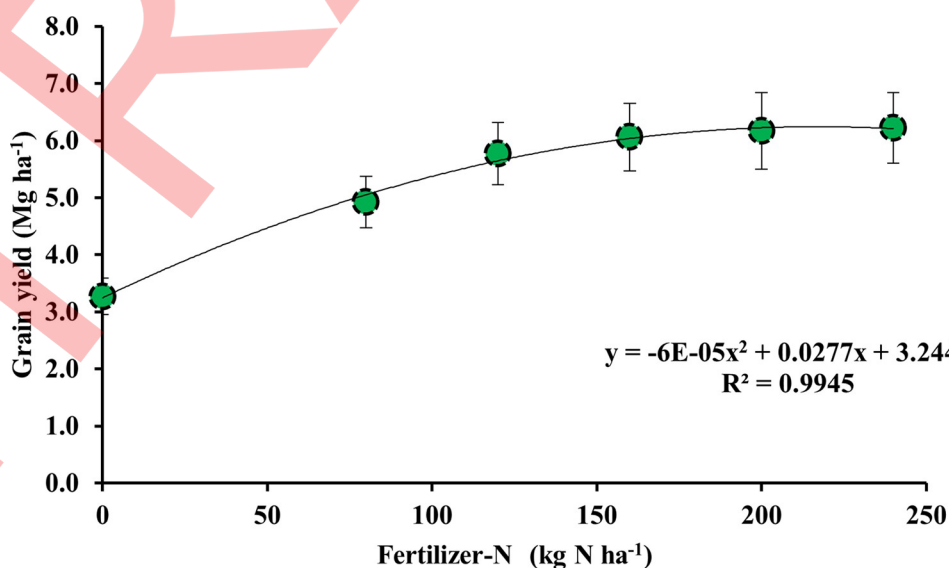

Fig 2. Relationship between fertilizer-N application rate (kg N ha<sup>-1</sup>) and grain yield (Mg ha<sup>-1</sup>) of wheat (*Triticum aestivum* L.) in a sandy loam soil. Line bars indicate standard error from mean (S.E.M.).

<https://doi.org/10.1371/journal.pone.0264210.g002>



Table 3. Effect of nitrogen (N) and potassium (K) application on N uptake by grain and straw of wheat (*Triticum aestivum* L.) in a sandy loam soil in sub-tropical India.

| Treatment                 | Grain N uptake (kg ha <sup>-1</sup> ) |       |        | Straw N uptake (kg ha <sup>-1</sup> ) |      |        | Total N uptake (kg ha <sup>-1</sup> ) |       |        |
|---------------------------|---------------------------------------|-------|--------|---------------------------------------|------|--------|---------------------------------------|-------|--------|
|                           | 2012                                  | 2013  | Pooled | 2012                                  | 2013 | Pooled | 2012                                  | 2013  | Pooled |
| Main plot (N application) |                                       |       |        |                                       |      |        |                                       |       |        |
| N <sub>0</sub>            | 25.7                                  | 24.7  | 25.2   | 7.1                                   | 9.1  | 8.1    | 32.8                                  | 33.7  | 33.3   |
| N <sub>80</sub>           | 71.9                                  | 64.8  | 68.3   | 19.9                                  | 19.1 | 19.5   | 91.8                                  | 83.9  | 87.8   |
| N <sub>120</sub>          | 88.1                                  | 86.6  | 87.3   | 23.1                                  | 21.8 | 22.5   | 111.2                                 | 108.4 | 109.8  |
| N <sub>160</sub>          | 95.1                                  | 106.4 | 100.8  | 25.9                                  | 24.1 | 25.0   | 121.0                                 | 130.5 | 125.7  |
| N <sub>200</sub>          | 99.0                                  | 114.5 | 106.8  | 28.1                                  | 26.6 | 27.4   | 127.2                                 | 141.1 | 134.1  |
| N <sub>240</sub>          | 110.8                                 | 135.6 | 123.2  | 35.1                                  | 35.5 | 35.3   | 145.8                                 | 171.1 | 158.4  |
| LSD ( <i>p</i> <0.05)     | 12.9                                  | 12.7  | 12.1   | 5.1                                   | 5.3  | 4.9    | 16.9                                  | 15.5  | 15.2   |
| Sub-plot (K application)  |                                       |       |        |                                       |      |        |                                       |       |        |
| K <sub>0</sub>            | 79.7                                  | 91.4  | 85.5   | 23.1                                  | 23.3 | 23.2   | 102.8                                 | 114.7 | 108.7  |
| K <sub>30</sub>           | 83.9                                  | 89.4  | 86.7   | 22.6                                  | 21.9 | 22.3   | 106.5                                 | 111.3 | 108.9  |
| K <sub>60</sub>           | 83.5                                  | 89.9  | 86.7   | 22.8                                  | 22.0 | 22.4   | 106.3                                 | 112.0 | 109.1  |
| K <sub>90</sub>           | 80.0                                  | 84.3  | 82.1   | 24.3                                  | 23.5 | 23.9   | 104.3                                 | 107.8 | 106.0  |
| LSD ( <i>p</i> <0.05)     | NS                                    | NS    | NS     | NS                                    | NS   | NS     | NS                                    | NS    | NS     |

<https://doi.org/10.1371/journal.pone.0264210.t003>

## 2.2. Nutrient uptake and leaf greenness

Fertilizer-N application significantly increased the grain, straw and total (grain + straw) N uptake by wheat during the study years (Table 3). Grain N uptake increased significantly with N<sub>160</sub> compared with N<sub>120</sub> during the second years, but non-significantly during the first year. Data pooled for two study years revealed that grain N uptake was significantly increased with N<sub>160</sub> than the N<sub>120</sub>. Grain-N uptake was increased by ~3.5 and 4.0-times with N<sub>120</sub> and N<sub>160</sub>, respectively over the N<sub>0</sub>. As compared with N<sub>120</sub>, N<sub>160</sub> resulted in ~15.5% increase in grain N uptake by wheat. The highest straw N uptake was observed with N<sub>240</sub>; although N<sub>120</sub> and N<sub>160</sub> increased the straw N uptake by ~2.8 and 3.1-times than the N<sub>0</sub>. The total N uptake by wheat varied between 33.3 and 158.4 kg ha<sup>-1</sup>; showing an increase of ~3.8 and 4.0-times with N<sub>120</sub> and N<sub>160</sub> over N<sub>0</sub>.

These results revealed that increased fertilizer-N rate of N<sub>160</sub> resulted in only ~6.7% increase in total N uptake by wheat. It was important to note that fertilizer-K application did not result in significant change in total N uptake by wheat. The interaction effect of fertilizer-N and K application was statistically non-significant.

Fertilizer-N application significantly increased the SPAD reading by ~4.2–10.6% with fertilizer-N application (N<sub>80</sub>–N<sub>240</sub>), compared with N<sub>0</sub> (Fig 3). At higher fertilizer-N rate (N<sub>160</sub>) the SPAD reading increased by ~2.3%, compared with N<sub>120</sub>. Fertilizer-K application did not significantly change the SPAD reading. The green seeker value followed the similar trend to that of the SPAD reading, with no significant change due to fertilizer-K application. Fig 4 illustrates the relationship between SPAD value and grain, straw and total N uptake by wheat. The relationship indicates increase in N uptake with the increase in SPAD value, which could best be described by Eqs 3–5.

$$\text{Grain N uptake (kg N ha}^{-1}\text{)} = -2.526 (\text{SPAD reading})^2 + 217.0 (\text{SPAD reading}) - 4540, R^2 = 0.971 \quad (3)$$

$$\text{Straw N uptake (kg N ha}^{-1}\text{)} = -0.36 (\text{SPAD reading})^2 + 32.98 (\text{SPAD reading}) - 716.9, R^2 = 0.941 \quad (4)$$

$$\text{Total N uptake (kg N ha}^{-1}\text{)} = -2.888 (\text{SPAD reading})^2 + 250.1 (\text{SPAD reading}) - 5259, R^2 = 0.969 \quad (5)$$

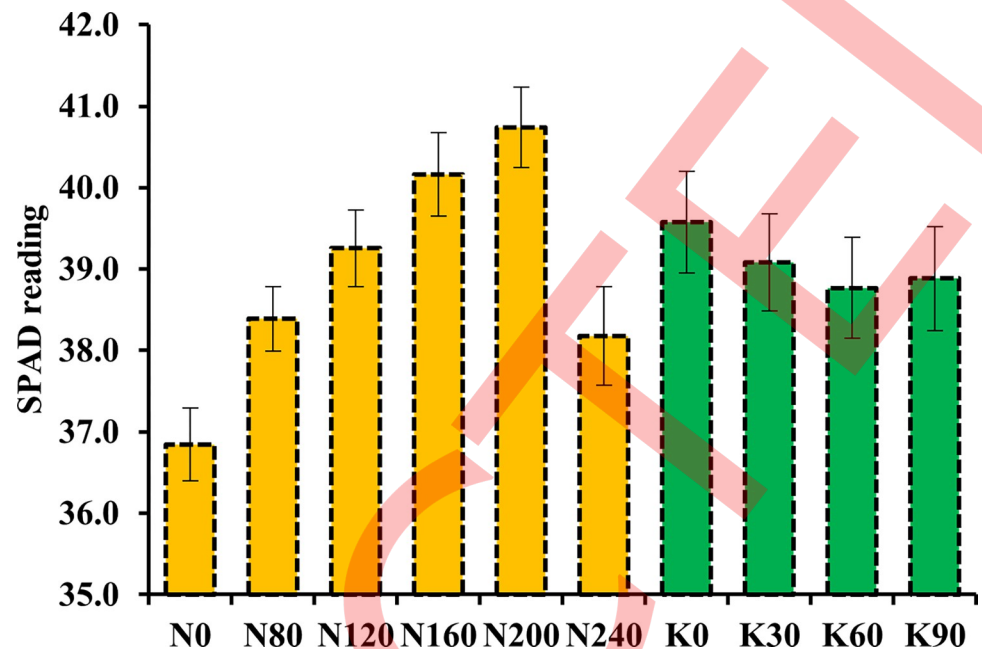

Fig 3. Effect of nitrogen (N) and potassium (K) application on SPAD value of wheat (*Triticum aestivum* L.) in a sandy loam soil in sub-tropical India. Bars indicate the standard error from mean (S.E.M.).

<https://doi.org/10.1371/journal.pone.0264210.g003>

Fig 5 showed the green seeker value in response to fertilizer-N application in wheat. The N uptake exhibited an increase as a function of green seeker reading (Fig 6). The relationship between green seeker reading and N uptake by straw, grains and total N uptake has been

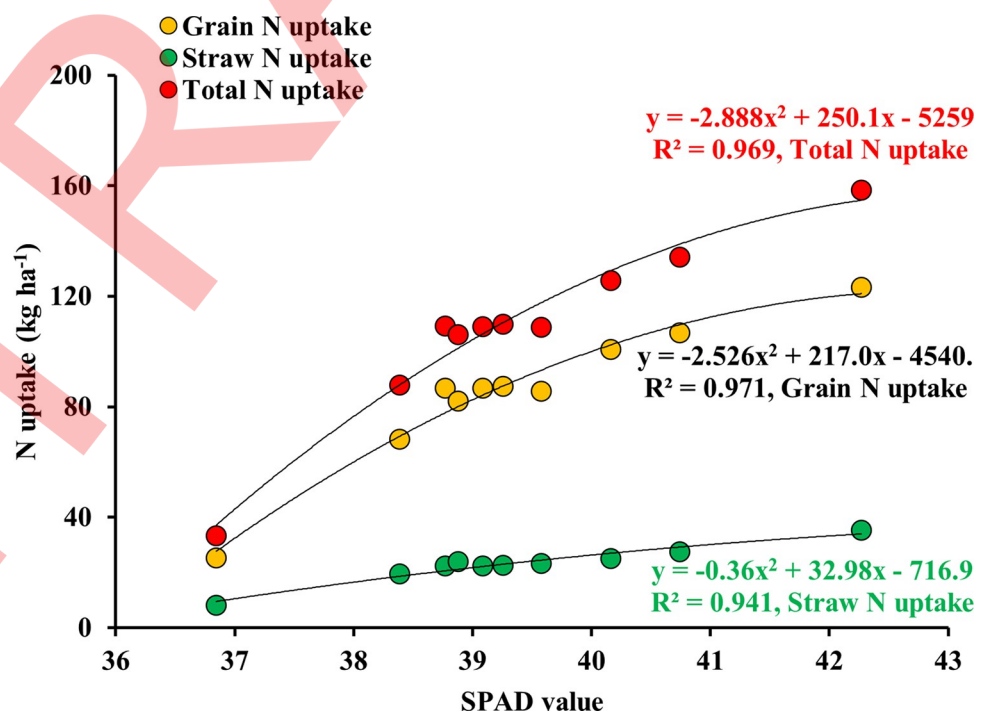

Fig 4. Quantitative relationship between SPAD value and N uptake ( $\text{kg ha}^{-1}$ ) by grain, straw and total (grain + straw) N uptake by wheat (*Triticum aestivum* L.) in a sandy loam soil.

<https://doi.org/10.1371/journal.pone.0264210.g004>

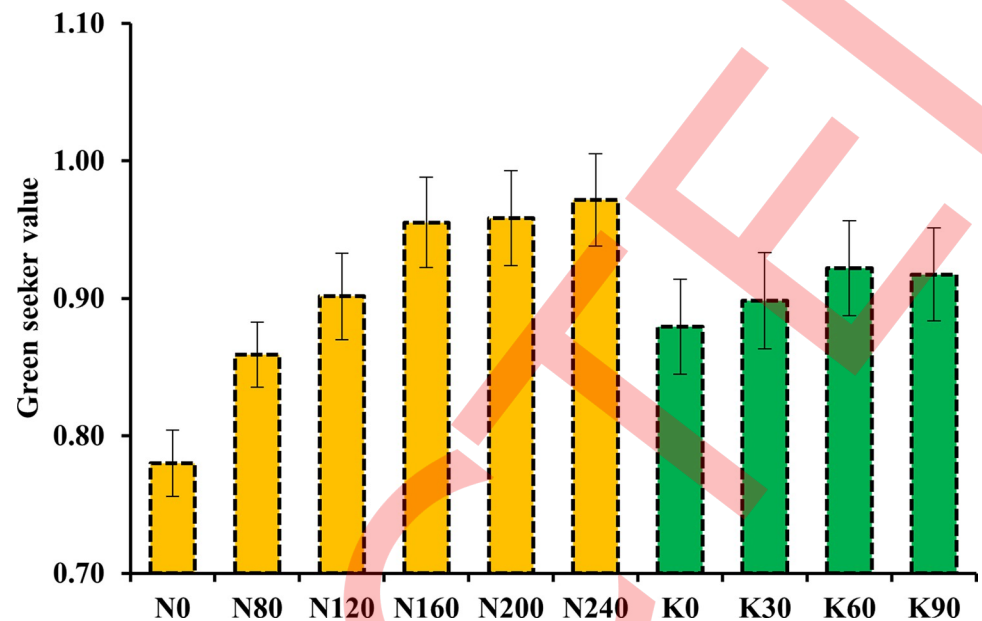

Fig 5. Effect of nitrogen (N) and potassium (K) application on green seeker value for wheat (*Triticum aestivum* L.) in a sandy loam soil in sub-tropical India. Bars indicate the standard error from mean (S.E.M.).

<https://doi.org/10.1371/journal.pone.0264210.g005>

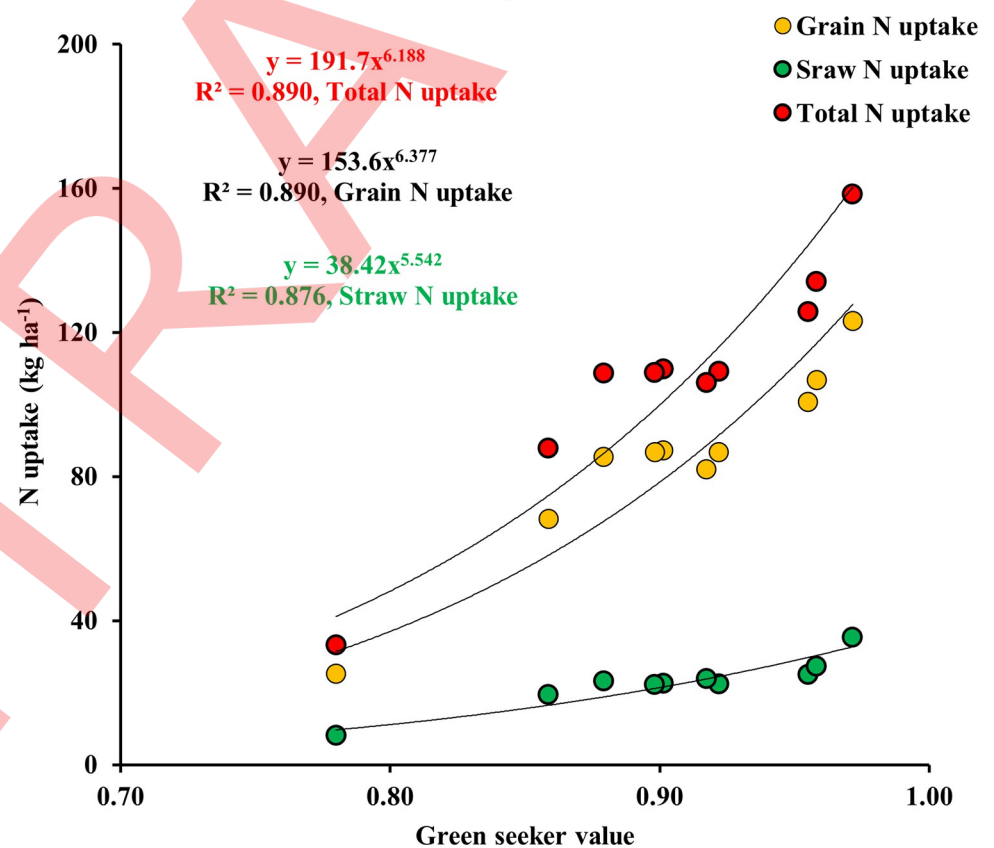

Fig 6. Quantitative relationship between Green seeker value and N uptake by grain, straw and total (grain + straw) N uptake by wheat (*Triticum aestivum* L.) in a sandy loam soil.

<https://doi.org/10.1371/journal.pone.0264210.g006>



expressed in Eqs 6–8.

$$\text{Grain N uptake (kg N ha}^{-1}\text{)} = 153.6 (\text{green seeker reading})^{6.377}, R^2 = 0.890 \quad (6)$$

$$\text{Straw N uptake (kg N ha}^{-1}\text{)} = 0.876 (\text{green seeker reading})^{5.542}, R^2 = 0.876 \quad (7)$$

$$\text{Total N uptake (kg N ha}^{-1}\text{)} = 191.7 (\text{green seeker reading})^{6.188}, R^2 = 0.890 \quad (8)$$

Fertilizer-N application resulted in a significant increase in K uptake by grains and straw (Table 4). Data pooled for two years showed that grain K uptake varied between 11.8 and 22.3 kg ha<sup>-1</sup>; with ~84.7% increase in N<sub>120</sub> than the N<sub>0</sub> treatment. There was non-significant difference in grain K uptake at higher fertilizer-N rates (N<sub>160</sub>-N<sub>240</sub>). These results showed that wheat straw K uptake was significantly increased with N<sub>120</sub>; followed by non-significant change at higher fertilizer-N rates. The total K uptake followed the similar response to fertilizer-N application, with highest K uptake at N<sub>120</sub>. Data pooled for different study shows that there was non-significant difference in grain, straw and total K uptake with different rates of fertilizer-K application. Nonetheless, the interaction effect of fertilizer-N and K on K uptake by grains and straw was non-significant.

### 2.3. Nitrogen and potassium use efficiency

The PFP<sub>N</sub> decreased significantly with increased fertilizer-N application rate in wheat, but do not differ significantly with the application of fertilizer-K (Table 5). Data pooled for different study years showed that PFP<sub>N</sub> for wheat varied between 25.9 and 61.5 kg ha<sup>-1</sup>; with the highest in N<sub>80</sub> and the lowest in N<sub>240</sub>. The N<sub>160</sub> treatment decreased the PFP<sub>N</sub> by 10.1 kg ha<sup>-1</sup> (~21.0%), compared with N<sub>120</sub>. The AE<sub>N</sub> varied between 12.3 and 22.2 kg kg<sup>-1</sup> with significantly higher value of 20.8 kg kg<sup>-1</sup> in N<sub>120</sub>. Fertilizer-N application at higher rate (N<sub>160</sub>) significantly decreased the AE<sub>N</sub> by ~16.3% over N<sub>120</sub>. The two year pooled data showed that PE<sub>N</sub> was significantly higher with N<sub>120</sub> by ~44.6% than the N<sub>240</sub>. It was important to observe that PE<sub>N</sub>

**Table 4. Effect of nitrogen (N) and potassium (K) application on K uptake by grain and straw of wheat (*Triticum aestivum* L.) in a sandy loam soil in sub-tropical India.**

| Treatment                 | Grain K uptake (kg ha <sup>-1</sup> ) |      |        | Straw K uptake (kg ha <sup>-1</sup> ) |      |        | Total K uptake (kg ha <sup>-1</sup> ) |      |        |
|---------------------------|---------------------------------------|------|--------|---------------------------------------|------|--------|---------------------------------------|------|--------|
|                           | 2012                                  | 2013 | Pooled | 2012                                  | 2013 | Pooled | 2012                                  | 2013 | Pooled |
| Main plot (N application) |                                       |      |        |                                       |      |        |                                       |      |        |
| N <sub>0</sub>            | 11.9                                  | 11.7 | 11.8   | 23.2                                  | 24.5 | 23.9   | 35.1                                  | 36.3 | 35.7   |
| N <sub>80</sub>           | 21.5                                  | 21.0 | 21.3   | 52.7                                  | 51.6 | 52.2   | 74.2                                  | 72.6 | 73.4   |
| N <sub>120</sub>          | 21.1                                  | 22.5 | 21.8   | 61.8                                  | 65.0 | 63.4   | 82.9                                  | 87.5 | 85.2   |
| N <sub>160</sub>          | 19.9                                  | 24.0 | 21.9   | 59.3                                  | 57.3 | 58.3   | 79.2                                  | 81.3 | 80.3   |
| N <sub>200</sub>          | 19.7                                  | 24.8 | 22.2   | 62.8                                  | 61.5 | 62.1   | 82.5                                  | 86.3 | 84.4   |
| N <sub>240</sub>          | 19.2                                  | 25.5 | 22.3   | 69.0                                  | 72.0 | 70.5   | 88.2                                  | 97.5 | 92.8   |
| LSD ( <i>p</i> <0.05)     | 3.3                                   | 2.93 | 2.9    | 11.8                                  | 11.9 | 10.7   | 12.3                                  | 13.3 | 11.3   |
| Sub-plot (K application)  |                                       |      |        |                                       |      |        |                                       |      |        |
| K <sub>0</sub>            | 17.7                                  | 21.4 | 19.5   | 52.3                                  | 58.1 | 55.2   | 70.0                                  | 79.5 | 74.7   |
| K <sub>30</sub>           | 19.3                                  | 21.9 | 20.6   | 50.6                                  | 49.3 | 50.0   | 70.0                                  | 71.2 | 70.6   |
| K <sub>60</sub>           | 19.0                                  | 21.5 | 20.3   | 57.2                                  | 56.6 | 56.9   | 76.3                                  | 78.1 | 77.2   |
| K <sub>90</sub>           | 19.5                                  | 21.6 | 20.5   | 59.1                                  | 57.3 | 58.2   | 78.5                                  | 78.9 | 78.7   |
| LSD ( <i>p</i> <0.05)     | 1.6                                   | NS   | NS     | NS                                    | 9.5  | NS     | NS                                    | NS   | NS     |

<https://doi.org/10.1371/journal.pone.0264210.t004>

Table 5. Effect of nitrogen (N) and potassium (K) application on N use efficiency in wheat (*Triticum aestivum* L.) in a sandy loam soil in sub-tropical India.

| Treatment                 | Partial factor productivity (PFP <sub>N</sub> ; kg ha <sup>-1</sup> ) |      |        | Agronomic efficiency (AE <sub>N</sub> ; kg kg <sup>-1</sup> ) |      |        | Physiological efficiency (PE <sub>N</sub> ; kg kg <sup>-1</sup> ) |      |        | Reciprocal interval use efficiency (RIUE <sub>N</sub> ; kg Mg <sup>-1</sup> grain yield) |      |        |
|---------------------------|-----------------------------------------------------------------------|------|--------|---------------------------------------------------------------|------|--------|-------------------------------------------------------------------|------|--------|------------------------------------------------------------------------------------------|------|--------|
|                           | 2012                                                                  | 2013 | Pooled | 2012                                                          | 2013 | Pooled | 2012                                                              | 2013 | Pooled | 2012                                                                                     | 2013 | Pooled |
| Main plot (N application) |                                                                       |      |        |                                                               |      |        |                                                                   |      |        |                                                                                          |      |        |
| N <sub>0</sub>            | –                                                                     | –    | –      | –                                                             | –    | –      | –                                                                 | –    | –      | 10.0                                                                                     | 11.1 | 10.6   |
| N <sub>80</sub>           | 63.1                                                                  | 59.9 | 61.5   | 22.1                                                          | 22.4 | 22.2   | 30.4                                                              | 34.3 | 32.3   | 18.2                                                                                     | 17.5 | 17.9   |
| N <sub>120</sub>          | 47.2                                                                  | 48.9 | 48.0   | 19.9                                                          | 21.7 | 20.8   | 30.9                                                              | 37.2 | 34.1   | 19.6                                                                                     | 18.5 | 19.1   |
| N <sub>160</sub>          | 34.8                                                                  | 41.0 | 37.9   | 14.3                                                          | 20.6 | 17.4   | 26.0                                                              | 35.8 | 30.9   | 21.8                                                                                     | 19.9 | 20.9   |
| N <sub>200</sub>          | 27.8                                                                  | 33.9 | 30.9   | 11.4                                                          | 17.6 | 14.5   | 24.6                                                              | 34.7 | 29.6   | 22.8                                                                                     | 20.9 | 21.9   |
| N <sub>240</sub>          | 22.7                                                                  | 29.2 | 25.9   | 9.0                                                           | 15.6 | 12.3   | 19.3                                                              | 28.0 | 23.6   | 26.8                                                                                     | 24.4 | 25.6   |
| LSD ( <i>p</i> <0.05)     | 6.2                                                                   | 2.1  | 3.5    | 5.1                                                           | 2.1  | 2.9    | 3.5                                                               | 3.2  | 3.4    | 1.2                                                                                      | 2.4  | 2.2    |
| Sub-plot (K application)  |                                                                       |      |        |                                                               |      |        |                                                                   |      |        |                                                                                          |      |        |
| K <sub>0</sub>            | 37.6                                                                  | 43.2 | 40.4   | 12.1                                                          | 18.6 | 15.3   | 20.9                                                              | 27.1 | 24.0   | 20.2                                                                                     | 18.8 | 19.5   |
| K <sub>30</sub>           | 39.0                                                                  | 41.9 | 40.4   | 12.8                                                          | 15.8 | 14.3   | 21.8                                                              | 27.4 | 24.6   | 20.2                                                                                     | 18.9 | 19.6   |
| K <sub>60</sub>           | 39.6                                                                  | 42.7 | 41.2   | 13.0                                                          | 15.9 | 14.5   | 21.6                                                              | 30.5 | 26.0   | 19.8                                                                                     | 19.0 | 19.4   |
| K <sub>90</sub>           | 40.2                                                                  | 42.5 | 41.4   | 13.1                                                          | 15.0 | 14.1   | 23.2                                                              | 28.3 | 25.8   | 19.3                                                                                     | 18.1 | 18.7   |
| LSD ( <i>p</i> <0.05)     | NS                                                                    | NS   | NS     | NS                                                            | NS   | NS     | NS                                                                | NS   | NS     | NS                                                                                       | NS   | NS     |

<https://doi.org/10.1371/journal.pone.0264210.t005>

did not differ significantly among N<sub>120</sub> and N<sub>160</sub>. The RIUE<sub>N</sub> varied between 10.6 and 25.6 kg Mg<sup>-1</sup> grain yield, and increased significantly by ~80.2% with N<sub>120</sub> as compared to N<sub>0</sub> treatment. The RIUE<sub>N</sub> did not differ significantly among N<sub>120</sub> and N<sub>160</sub>. The effect of fertilizer-K and interaction effect of fertilizer-N and K was statistically non-significant for PFP<sub>N</sub>, AE<sub>N</sub>, PE<sub>N</sub> and the RIUE<sub>N</sub>.

The PFP<sub>K</sub> increased significantly with fertilizer-N and K application in wheat (Table 6). Fertilizer-N application at 120 kg N ha<sup>-1</sup> increased the PFP<sub>K</sub> by 38.3 kg ha<sup>-1</sup> (~76.9%), compared with the N<sub>0</sub> treatment. However, the PFP<sub>K</sub> did not differ significantly among different fertilizer-N application rates (N<sub>80</sub>-N<sub>240</sub>). The PFP<sub>K</sub> was highest at K<sub>30</sub> and decreased by ~2-times with K<sub>60</sub> treatment. Fertilizer-N application at N<sub>120</sub> increased the AE<sub>K</sub> by ~52.6%

Table 6. Effect of nitrogen (N) and potassium (K) application on K use efficiency in wheat (*Triticum aestivum* L.) in a sandy loam soil in sub-tropical India.

| Treatment                 | Partial factor productivity (PFP <sub>K</sub> ; kg ha <sup>-1</sup> ) |       |        | Agronomic efficiency (AE <sub>K</sub> ; kg kg <sup>-1</sup> ) |      |        | Physiological efficiency (PE <sub>K</sub> ; kg kg <sup>-1</sup> ) |      |        | Reciprocal interval use efficiency (RIUE <sub>K</sub> ; kg Mg <sup>-1</sup> grain yield) |      |        |
|---------------------------|-----------------------------------------------------------------------|-------|--------|---------------------------------------------------------------|------|--------|-------------------------------------------------------------------|------|--------|------------------------------------------------------------------------------------------|------|--------|
|                           | 2012                                                                  | 2013  | Pooled | 2012                                                          | 2013 | Pooled | 2012                                                              | 2013 | Pooled | 2012                                                                                     | 2013 | Pooled |
| Main plot (N application) |                                                                       |       |        |                                                               |      |        |                                                                   |      |        |                                                                                          |      |        |
| N <sub>0</sub>            | 50.3                                                                  | 49.4  | 49.8   | –                                                             | –    | –      | –                                                                 | –    | –      | 10.6                                                                                     | 11.1 | 10.9   |
| N <sub>80</sub>           | 77.3                                                                  | 72.6  | 75.0   | 27.1                                                          | 23.2 | 25.1   | 46.2                                                              | 43.2 | 44.7   | 14.6                                                                                     | 15.1 | 14.9   |
| N <sub>120</sub>          | 87.7                                                                  | 88.4  | 88.1   | 37.4                                                          | 39.1 | 38.3   | 51.5                                                              | 58.7 | 55.1   | 15.6                                                                                     | 14.8 | 15.2   |
| N <sub>160</sub>          | 86.1                                                                  | 100.9 | 93.5   | 35.8                                                          | 51.5 | 43.7   | 56.6                                                              | 75.8 | 66.2   | 14.2                                                                                     | 12.4 | 13.3   |
| N <sub>200</sub>          | 85.4                                                                  | 102.0 | 93.7   | 35.1                                                          | 52.7 | 43.9   | 51.3                                                              | 75.8 | 63.5   | 14.8                                                                                     | 12.8 | 13.8   |
| N <sub>240</sub>          | 83.1                                                                  | 105.6 | 94.3   | 32.9                                                          | 56.2 | 44.5   | 43.3                                                              | 66.2 | 54.7   | 16.2                                                                                     | 13.9 | 15.1   |
| LSD ( <i>p</i> <0.05)     | 31.7                                                                  | 44.1  | 34.2   | NS                                                            | 5.4  | 4.8    | NS                                                                | 17.7 | 9.3    | 2.1                                                                                      | 1.7  | 1.8    |
| Sub-plot (K application)  |                                                                       |       |        |                                                               |      |        |                                                                   |      |        |                                                                                          |      |        |
| K <sub>0</sub>            | –                                                                     | –     | –      | –                                                             | –    | –      | 41.0                                                              | 45.9 | 50.9   | 14.6                                                                                     | 13.5 | 14.0   |
| K <sub>30</sub>           | 169.0                                                                 | 187.2 | 178.1  | 60.6                                                          | 81.5 | 71.0   | 39.1                                                              | 45.4 | 51.8   | 13.6                                                                                     | 12.6 | 13.1   |
| K <sub>60</sub>           | 86.0                                                                  | 95.3  | 90.7   | 30.9                                                          | 41.2 | 36.0   | 45.8                                                              | 53.1 | 60.5   | 14.6                                                                                     | 13.8 | 14.2   |
| K <sub>90</sub>           | 58.2                                                                  | 63.4  | 60.8   | 20.7                                                          | 25.8 | 23.3   | 40.1                                                              | 45.0 | 49.9   | 14.6                                                                                     | 13.6 | 14.1   |
| LSD ( <i>p</i> <0.05)     | 29.5                                                                  | 38.1  | 40.2   | 5.9                                                           | 5.2  | 5.6    | NS                                                                | NS   | NS     | NS                                                                                       | NS   | NS     |

<https://doi.org/10.1371/journal.pone.0264210.t006>

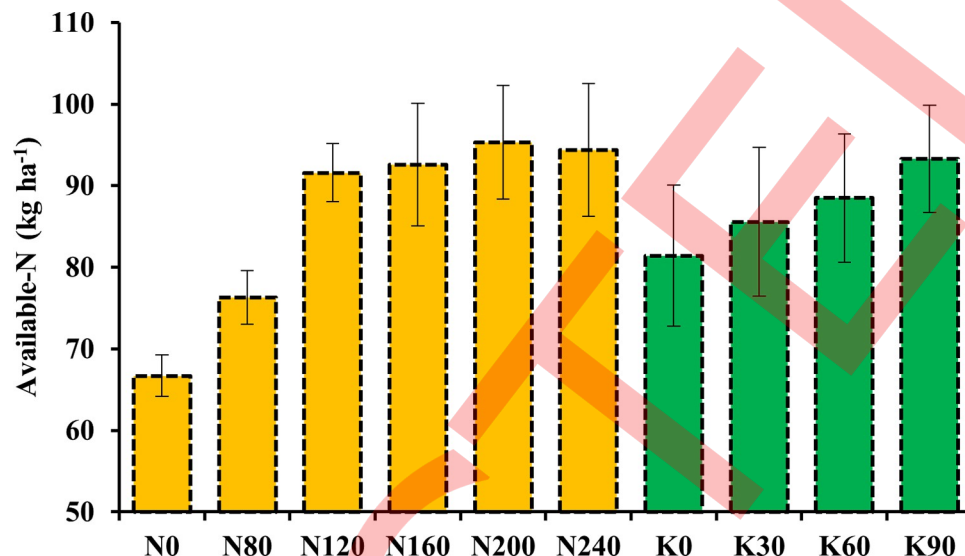

**Fig 7. Effect of nitrogen (N) and potassium (K) application on available-N content in a sandy loam soil in sub-tropical India.** Bars indicate the standard error from mean (S.E.M.).

<https://doi.org/10.1371/journal.pone.0264210.g007>

than  $N_{80}$  treatment. Similarly,  $K_{30}$  treatment had the highest, while the  $K_{90}$  had the significantly lower  $AE_K$ . The  $PE_K$  was highest in  $N_{160}$ , which was ~19.8% higher than  $N_{120}$  treatment. The  $PE_K$  did not differ significantly with fertilizer-K application at different rates. The  $RIUE_K$  varied between 109 and 15.1 kg  $Mg^{-1}$  grain yield, and was significantly higher in  $N_{120}$  treatment. The effect of fertilizer-K and interaction effect of fertilizer-N and K on  $RIUE_K$  of wheat crop statistically non-significant.

## 2.4. Available nitrogen and potassium content

Fig 7 showed that available-N content in soil was significantly increased with fertilizer-N application. The available-N content in soil increased by ~37.3% with  $N_{120}$  treatment compared with the  $N_0$ . There was non-significant change in available-N content in soil with fertilizer-N application rates of  $N_{120}$ ,  $N_{160}$ ,  $N_{200}$  and  $N_{240}$ . Fertilizer-K application had non-significant effect on available-N content in soil. Available-K content in soil was highest in  $N_{120}$  treatment, and was ~8.3% higher than  $N_0$  (Fig 8). Fertilizer-K application at  $K_{30}$ ,  $K_{60}$  and  $K_{90}$  increased the available-K content in soil by ~9.1, 11.5 and 15.3%, respectively.

## 2.5. Economic analysis

The MCCIs varied between 364 US\$  $ha^{-1}$  and 408 US\$  $ha^{-1}$  yielded MGRs of 835 US\$  $ha^{-1}$  and 1594 US\$  $ha^{-1}$  for different fertilizer-N and K application treatments in wheat (Table 7). The MGRs were significantly higher by ~17.3% with  $N_{120}$  as compared to  $N_{80}$ . The application of higher fertilizer-N application rates did not significantly increased the MGRs for wheat cultivation. The MNRs varied between 471 US\$  $ha^{-1}$  for  $N_0$  and 1187 US\$  $ha^{-1}$  for  $N_{240}$  treatments. Similarly, the MNRs varied between 1115 and 1130 US\$  $ha^{-1}$  among different fertilizer-K treatments ( $K_0$ - $K_{90}$ ). Fertilizer-N application at 120 kg N  $ha^{-1}$  ( $N_{120}$ ) resulted in significantly higher MNRs by ~24.1% than the  $N_{80}$  treatment. The B-C ratio was significantly increased by ~66.1% with  $N_{120}$  than the  $N_0$  treatment. The higher fertilizer-N application rates ( $N_{160}$ - $N_{240}$ ) resulted in ~1.4–3.4% increase in B-C ratio of wheat. The economic efficiency of wheat increased by ~24.1% with  $N_{120}$  than  $N_{80}$  treatments; however, the higher fertilizer-N application rates did

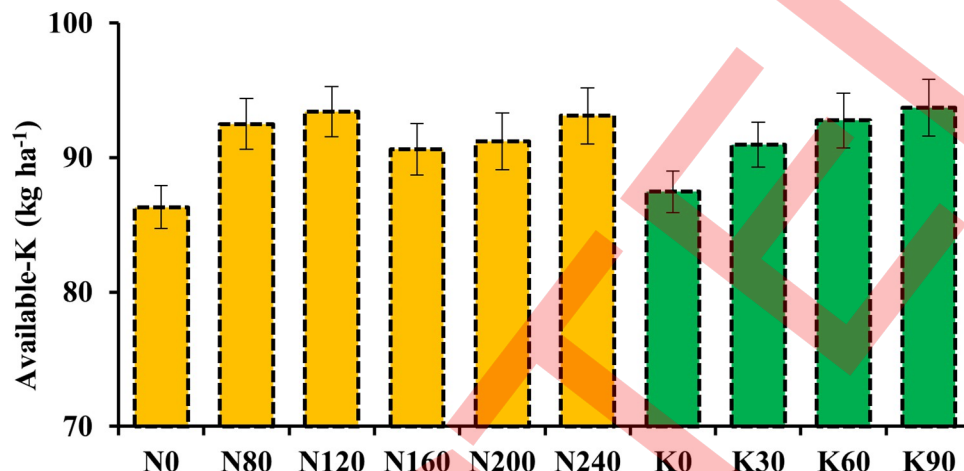

Fig 8. Effect of nitrogen (N) and potassium (K) application on available-K content in a sandy loam soil in sub-tropical India. Bars indicate the standard error from mean (S.E.M.).

<https://doi.org/10.1371/journal.pone.0264210.g008>

not significantly increase the economic efficiency. The GRAFC varied between 835 and 1550 US\$ ha<sup>-1</sup>; a significantly higher returns (by ~210 US\$ ha<sup>-1</sup>; ~16.9%) were obtained under N<sub>120</sub> than N<sub>80</sub>. The ROI of 66.9 US\$ gross returns US\$<sup>-1</sup> cost were significantly higher by ~84.8% in N<sub>120</sub> than the N<sub>240</sub> treatment. At lower fertilizer-N application rate (N<sub>80</sub>), the ROI although increased by ~23.3%, but were statistically non-significant.

## 2.6. Relationship between potassium fractions, crop yields and potassium uptake

Correlation matrix revealed that wheat grain yield was highly correlated with grain N uptake ( $r = 0.924^{**}$ ,  $p < 0.01$ ), straw N uptake ( $r = 0.831^{**}$ ,  $p < 0.01$ ), grain K uptake ( $r = 0.825^{**}$ ,

Table 7. Effect of nitrogen (N) and potassium (K) application on economic indices viz. mean cost of cash inputs (MCCIs), mean gross returns (MGRs), mean net returns (MNRs), benefit-cost (B-C) ratio, economic efficiency, gross returns above the fertilizer cost (GRAFC) and returns on investment on fertilizer application (ROI) for wheat (*Triticum aestivum* L.) cultivation in a sandy loam soil in sub-tropical India. (Data pooled for two study years).

| Treatment                 | MCCIs (US\$ ha <sup>-1</sup> ) | MGRs (US\$ ha <sup>-1</sup> ) | MNRs (US\$ ha <sup>-1</sup> ) | B-C ratio | Economic efficiency (US\$ ha <sup>-1</sup> d <sup>-1</sup> ) | GRAFC (US\$ ha <sup>-1</sup> ) | ROI (US\$ gross returns US\$ <sup>-1</sup> cost) |
|---------------------------|--------------------------------|-------------------------------|-------------------------------|-----------|--------------------------------------------------------------|--------------------------------|--------------------------------------------------|
| Main plot (N application) |                                |                               |                               |           |                                                              |                                |                                                  |
| N <sub>0</sub>            | 364                            | 835                           | 471                           | 2.30      | 3.08                                                         | 835                            | –                                                |
| N <sub>80</sub>           | 378                            | 1256                          | 877                           | 3.32      | 5.73                                                         | 1241                           | 85.5                                             |
| N <sub>120</sub>          | 386                            | 1473                          | 1088                          | 3.82      | 7.11                                                         | 1451                           | 66.9                                             |
| N <sub>160</sub>          | 393                            | 1551                          | 1158                          | 3.95      | 7.57                                                         | 1522                           | 52.8                                             |
| N <sub>200</sub>          | 400                            | 1580                          | 1180                          | 3.95      | 7.71                                                         | 1544                           | 43.0                                             |
| N <sub>240</sub>          | 408                            | 1594                          | 1187                          | 3.91      | 7.76                                                         | 1550                           | 36.2                                             |
| LSD ( $p < 0.05$ )        |                                | 125.9                         | 103.4                         | 0.32      | 1.8                                                          | 105.4                          | 19.1                                             |
| Sub-plot (K application)  |                                |                               |                               |           |                                                              |                                |                                                  |
| K <sub>0</sub>            | 364                            | 1479                          | 1115                          | 4.07      | 7.29                                                         | 1479                           | –                                                |
| K <sub>30</sub>           | 368                            | 1476                          | 1108                          | 4.01      | 7.24                                                         | 1471                           | 337.6                                            |
| K <sub>60</sub>           | 372                            | 1502                          | 1130                          | 4.04      | 7.39                                                         | 1494                           | 171.8                                            |
| K <sub>90</sub>           | 377                            | 1507                          | 1130                          | 4.00      | 7.39                                                         | 1494                           | 114.9                                            |
| LSD ( $p < 0.05$ )        |                                | NS                            | NS                            | NS        | NS                                                           | NS                             | 65.4                                             |

<https://doi.org/10.1371/journal.pone.0264210.t007>

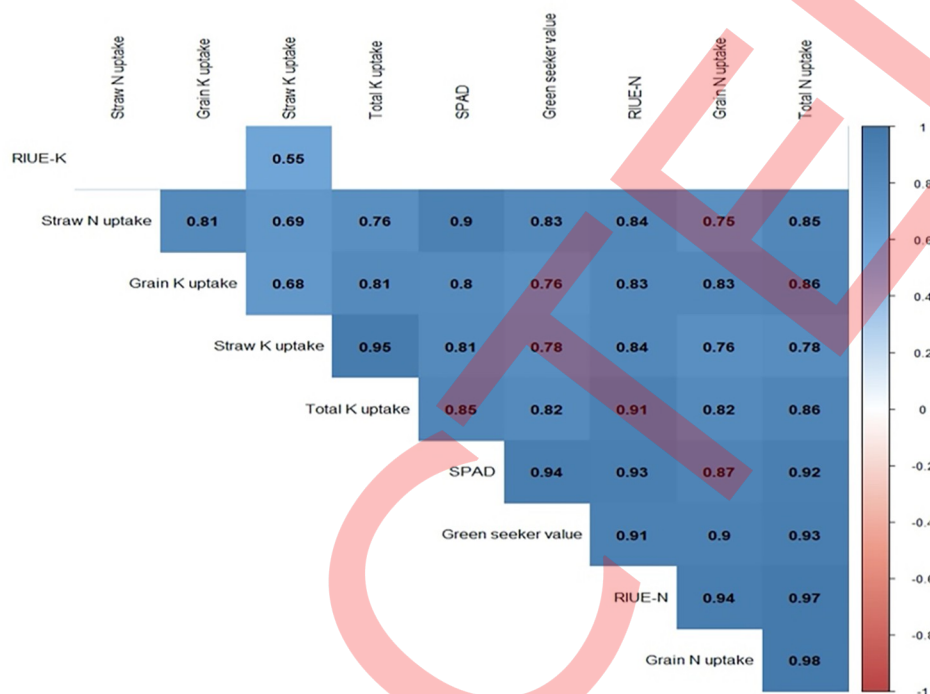

**Fig 9. Correlation matrix depicting relationships between different variables and wheat grain yield ( $r > 0.435$ ; significant at  $p < 0.05$  and  $r > 0.802$  significant at  $p < 0.01$ , others non-significant).**

<https://doi.org/10.1371/journal.pone.0264210.g009>

$p < 0.01$ ), straw K uptake ( $r = 0.838^{**}$ ,  $p < 0.01$ ), total N uptake value ( $r = 0.932^{**}$ ,  $p < 0.01$ ) and total K uptake ( $r = 0.851^{**}$ ,  $p < 0.01$ ) (Fig 9). Wheat grain yield also exhibited a significant linear relationship with SPAD value ( $r = 0.945^{**}$ ,  $p < 0.01$ ), green seeker reading ( $r = 0.956^{**}$ ,  $p < 0.01$ ),  $RIUE_N$  ( $r = 0.910^{**}$ ,  $p < 0.01$ ). We tested different regression models (Table 8) to improve the prediction of wheat grain yield by including several yield attributes. A regression model included grain and straw N and K uptake,  $RIUE_N$  and  $RIUE_K$ , SPAD and green seeker values explained ~85.3–98.4% of the wheat grain yields.

**Table 8. Stepwise regression among different variables for predicting wheat (*Triticum aestivum* L.) grain yield.**

| Response | Regression equation                                                                             | $R^2_{adj}$ | $R^2$ | F value | $p$ (<0.05)         |
|----------|-------------------------------------------------------------------------------------------------|-------------|-------|---------|---------------------|
| $Y_1$    | $2.698 + 0.031X_1$                                                                              | 0.847       | 0.853 | 127.9   | 0.0001 <sup>a</sup> |
| $Y_2$    | $2.511 + 0.023X_1 + 0.041X_2$                                                                   | 0.887       | 0.897 | 91.2    | 0.0002 <sup>b</sup> |
| $Y_3$    | $2.545 + 0.024X_1 + 0.042X_2 - 0.004X_3$                                                        | 0.881       | 0.897 | 58.0    | 0.0001 <sup>c</sup> |
| $Y_4$    | $2.273 - 0.019X_1 + 0.033X_2 - 0.003X_3 + 0.018X_4$                                             | 0.905       | 0.921 | 55.5    | 0.0001 <sup>d</sup> |
| $Y_5$    | $2.191 + 0.028X_1 + 0.046X_2 - 0.004X_3 + 0.019X_4 - 0.009X_5$                                  | 0.902       | 0.924 | 43.5    | 0.0002 <sup>e</sup> |
| $Y_6$    | $2.145 - 0.017X_1 - 0.009X_2 + 0.0110X_3 + 0.08X_4 + 0.033X_5 - 0.0075X_6$                      | 0.923       | 0.943 | 46.9    | 0.0001 <sup>f</sup> |
| $Y_7$    | $-3.781 - 0.09X_1 - 0.026X_2 + 0.099X_3 + 0.066X_4 + 0.020X_5 - 0.058X_6 + 0.184X_7$            | 0.942       | 0.963 | 54.2    | 0.0001 <sup>g</sup> |
| $Y_8$    | $-9.373 - 0.011X_1 - 0.026X_2 + 0.127X_3 + 0.067X_4 + 0.013X_5 - 0.059X_6 + 0.077X_7 + 11.7X_8$ | 0.975       | 0.984 | 114.1   | 0.0001 <sup>h</sup> |
| $Y_9$    | $-9.131 - 0.009X_1 - 0.116X_2 + 0.063X_3 + 0.014X_4 - 0.053X_5 + 0.091X_6 + 11.2X_7 - 0.389X_9$ | 0.974       | 0.984 | 98.7    | 0.0001 <sup>i</sup> |

$Y_1$ – $Y_9$  = Wheat grain yield,  $X_1$  = Grain N uptake,  $X_2$  = Straw N uptake,  $X_3$  = Grain K uptake,  $X_4$  = Straw K uptake,  $X_5$  = Total N uptake,  $X_6$  = Total K uptake,  $X_7$  = SPAD value,  $X_8$  = Green seeker value,  $X_9$  =  $RIUE_N$

<https://doi.org/10.1371/journal.pone.0264210.t008>



## 2.7. Evaluation of ANN developed for predicting wheat grain yield

A back propagation neural network with Levenberg Marquardt algorithm was used to establish the relationship between the input variables viz. grain N uptake, straw N uptake, grain K uptake, straw K uptake, total N uptake, total K uptake, SPAD value, green seeker value,  $RIUE_N$  and  $RIUE_K$  and the wheat grain yield. We applied back propagation neural networks technique, self-organizing map (SOM) neighbour weight distance and ANNs consisted of several layers of neurons which are inter-connected and then the weights were assigned to those inter-connections (Fig 9). The SOM is an unsupervised machine learning use to produce a low-dimensional representation of a higher dimensional data-set while preserving the topological structure of the data. The SOM depicts the input data as a table with a row for each value of input variable, and columns for each variable containing each value. The SOM algorithm arranged these variables in a two-dimensional grid placing with similar variable closer together. The schematic representation of weights (weight-1 and weight-2) assigned to the inter-connections for inputs used for the simulation of wheat grain yield has been shown in Fig 10. The ANNs exhibit a highly satisfactory performance in training and simulation of testing data-set, which indicates that a well-trained ANN model is well capable of producing consistent and accurate results. This consistency between the training and testing has been clearly illustrated in Fig 11. A high correlation ( $R^2 = 0.994^{**}$ ,  $p < 0.01$ ) between the predicted and actual values of wheat grain yield, which implies that ANN model succeeded in wheat grain yield prediction. Table 9 shows test statistics for ANN model evaluation (Fig 12). The calculated MAE, MAPE and RMSE for wheat were 0.0087, 0.834 and 0.052, respectively. The lowest possible RMSE value is zero, indicating that there is no difference between the actual and predicted data.

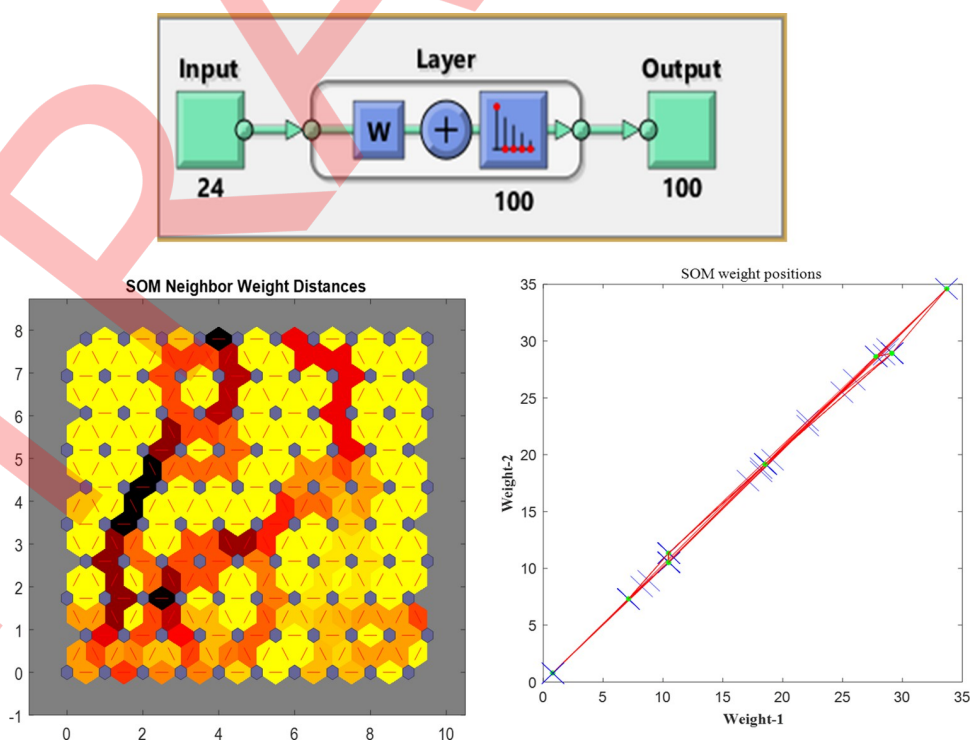

**Fig 10.** Schematic representation of propagation neural networks technique, self organizing map (SOM) neighbour weight distance and artificial neural networks (ANNs) consisted of several layers of neurons which are inter-connected and then the weights (weight-1 and weight-2) assigned to those inter-connections.

<https://doi.org/10.1371/journal.pone.0264210.g010>

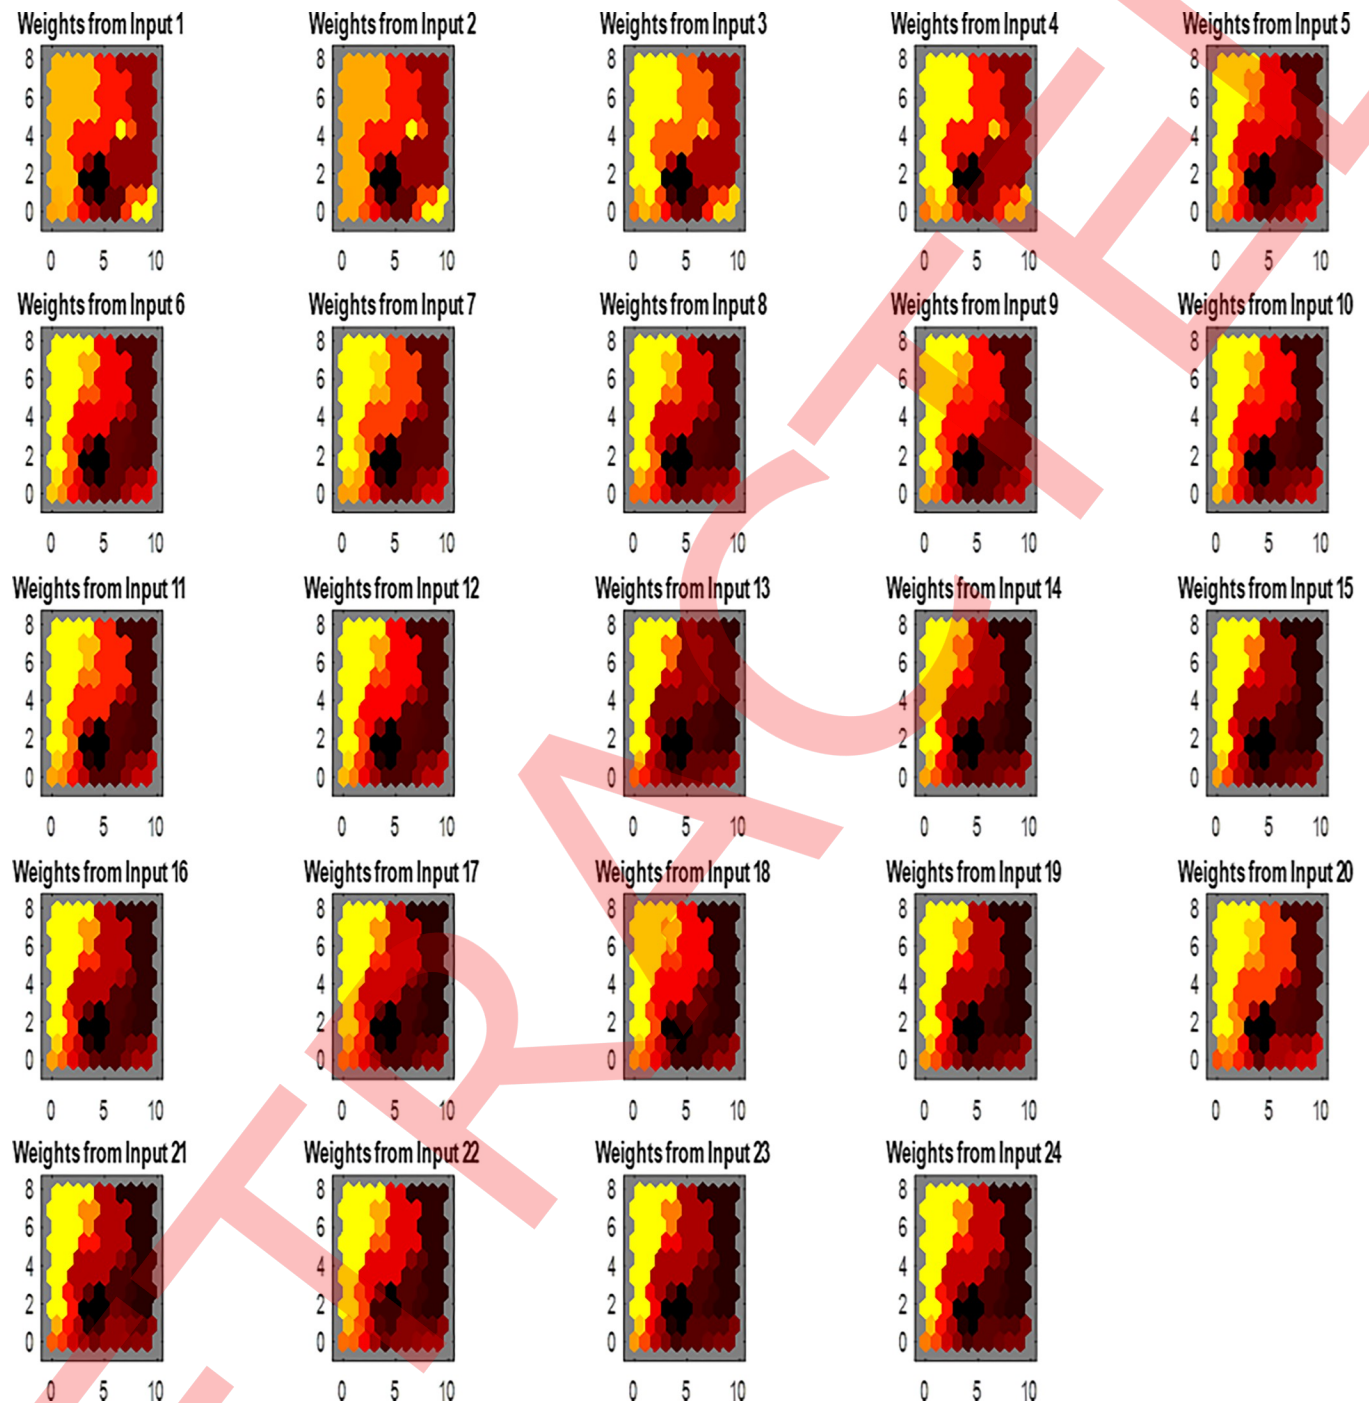

**Fig 11.** Schematic representation of weights (weight-1 and weight-2) assigned to the inter-connections for inputs used for the simulation of wheat grain yield using ten different input layers viz. grain N uptake, straw N uptake, grain K uptake, straw K uptake, total N uptake, total K uptake, SPAD value, green seeker value, RIUE<sub>N</sub> and RIUE<sub>K</sub>.

<https://doi.org/10.1371/journal.pone.0264210.g011>

### 3. Discussion

The fertilizer-N application significantly ( $p < 0.05$ ) increased the number of effective and non-effective tillers during 2 study years, while fertilizer-K application did not increased the yield

**Table 9. Statistical criteria for evaluating the performance of artificial neural networks (ANNs) for predicting wheat grain yield under different treatments based on grain and straw N uptake, grain and straw K uptake, total N and total K uptake, SPAD value, green seeker value, and reciprocal internal use efficiency of N (RIUE<sub>N</sub>) and K (RIUE<sub>K</sub>).**

| Statistical index | RR <sup>2†</sup> | MAE‡    | MAPE§  | RMSE#  |
|-------------------|------------------|---------|--------|--------|
| Value             | 00.994**         | 00.0087 | 00.834 | 00.052 |

<sup>†</sup>R<sup>2</sup> = Coefficient of determination

<sup>‡</sup>MAE = Mean absolute error

<sup>§</sup>MAPE = Mean absolute percentage error

<sup>#</sup>RMSE = Root mean square error

<sup>Δ</sup>MBE = Mean bias error

\*\*Significant at  $p < 0.01$

<https://doi.org/10.1371/journal.pone.0264210.t009>

attributing characters of wheat. The total number of tillers increased as a function of N application rates across all levels of K rate, but peaked up at 120 kg N ha<sup>-1</sup>. This could be major contribution of N towards cell division, elongation and enhancing the vegetative growth, and K contribute in promoting vigorous plant growth through efficient photosynthesis [44]. The individual application effect of fertilizer-N and K on number of tillers of wheat have been reported earlier [45, 46]. Furthermore, Bundy and Andraski [47] reported the combined application of fertilizer-N and K on increased tiller production. The number of effective tillers facilitates the identification of the number of spikes that plant generates, as they can survive and

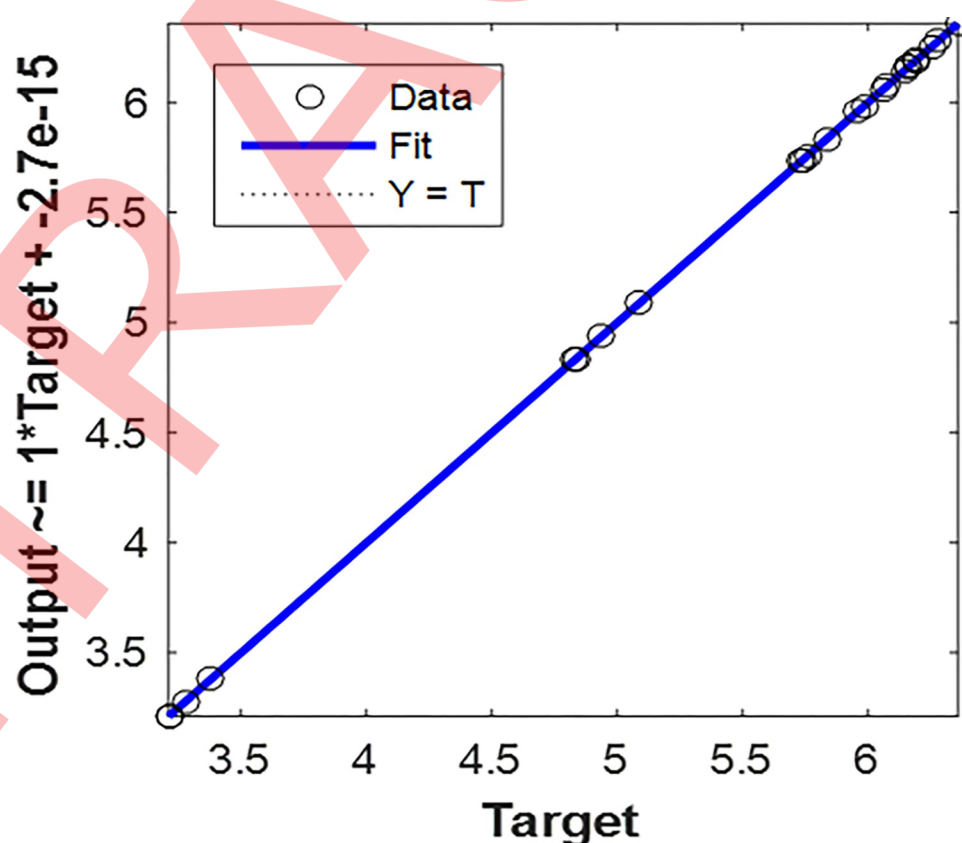

**Fig 12. Cross-correlation using scatter plot (1:1 correspondence,  $X = Y$ ) of predicted and actual wheat grain (Mg ha<sup>-1</sup>) using Levenberg Marquardt (LM) algorithm in artificial neural networks (ANNs).**

<https://doi.org/10.1371/journal.pone.0264210.g012>

produce grains [48]. The requirement for high wheat yields was influenced by population growth and development, mainly in terms of the increased tiller number per unit area [49]. The application of fertilizer-K was observed to regulate the N metabolism, which increases its absorption by the plant [50]. Therefore, when fertilizer-N and K are applied together, they enhance vegetative growth and resulted in increased number of fertile tillers per unit area.

Fertilizer-N fluxes in agro-ecosystems are important for assessing the effectiveness for wheat yield and in determining probable environmental contamination [51, 52]. The optimal fertilizer-N plays a positive role in the crop growth and productivity and helps improve the profitability and nutrient use efficiency. Some studies have shown that fertilizer-N application could increase crop yield, whereas excessive fertilizer-N application lead to yield reduction. In the present study, wheat grain yield increased significantly up to  $N_{120}$ , compared with higher level of fertilizer-N application rates, while K application did not significantly increase the wheat grain yield. In case of control, the growth and development of plants were hampered due to imbalance uptake of essential elements, which resulted in poor performance of yield attributes and ultimately gave the lowest wheat grain yield. These findings suggested that when the rate of fertilizer-N application increased to a certain extent ( $N_{160}$ - $N_{240}$ ), the wheat yield would not significantly increase, but there was no-significant decline. Therefore, similar to previous research [53], these results also shows that higher fertilizer-N application rates ensured higher crop yield, but was not necessary to achieve significant yield gain advantage. Similar to the grain yield, fertilizer-N application rate significantly increased crop N accumulation compared with the  $N_0$  control. However, the amount of N absorbed by crops on crop yield is affected by genetic and environmental factors, compromising the relationship between fertilizer-N application rate and its accumulation in the crop [54]. Unfortunately, most farmers applied the amount of fertilizer-N based on their experience, rather than testing soil nutrients and plant growth [55]. This strongly suggests that fertilizer-N rate above  $120 \text{ kg N ha}^{-1}$ , the N utilization by plants were nearly negligible and exposed to leaching, volatilization and immobilization losses. These results illustrates that combination of  $120 \text{ kg N ha}^{-1}$  with  $30 \text{ kg K ha}^{-1}$  increased the ability of plants for capturing resources and increased dry matter accumulation. In the present study, the effect of higher dose of fertilizer-K application ( $K_{60-90}$ ) or the interaction effect of fertilizer-N and K was statistically non-significant ( $p < 0.05$ ). The soils of studied region in north-western India are mostly containing smectite and illitic clay minerals [56]. When K is removed by plant roots from the soil solution, more K is released from the clay minerals by cation exchange. Nonetheless, average amount of K contributed to wheat through irrigation with underground water varied from 8 kg in piedmont plain to  $28 \text{ kg ha}^{-1}$  each in alluvial plain with occasional sand dune and alluvial plain with sand dune, respectively [57].

### 3.1. Nutrient uptake and leaf greenness

Fertilizer-N application significantly increased the grain, straw and total N uptake by wheat during the study years up to  $120 \text{ kg N ha}^{-1}$  as compared to higher rates of fertilizer-N application. Different rates of fertilizer-K application was showed non-significant difference in grain, straw and total K uptake. When the fertilizer-N application rate exceeds crop demand, the quantity of applied fertilizer-N used by the crops is reduced, and a larger amount of applied N remains in the soil or is lost [58]. In contrast, when the fertilizer-N rate is less than crop demand, soil N is depleted [59]. Therefore, the accumulation and loss of  $\text{NO}_3^- \text{N}$  in soil could be reduced by applying less amounts of fertilizer-N than or equal to that required for the optimal crop yield [25, 60].

The chlorophyll fluorescence parameters were used to estimate the function of photosynthetic apparatus and carbon assimilation rate due to its sensitivity, accessibility and non-



intrusive features [61, 62]. The leaf N content has been linked directly to the chlorophyll index [63], and varied with each phenological stage [64]. The reduction in light intensity and alterations in light spectrum under fertilizer-N application rates has shown to alter chloroplast ultra-structure and chlorophyll contents [61, 65]. In this study, fertilizer-N application significantly increased the SPAD value and green seeker reading by ~4.2–10.6% and 0.89–0.97%, respectively with fertilizer-N application ( $N_{80}$ – $N_{240}$ ), compared with  $N_0$ . Viana and Kiehl [38] reported that the chlorophyll index increased with fertilizer-N and potassium application. Teixeira Filho et al. [66] assessed the chlorophyll concentration in wheat plants and also reported that the fertilizer-N application rates influenced the leaf chlorophyll index, with maximum valued achieved was 46 N corresponding to the applied N dose of 147 kg N ha<sup>-1</sup>.

### 3.2. Nitrogen and potassium use efficiency

Nitrogen use efficiency is represented with N recovered efficiency in the crops and has a significant impact on air and water quality, biodiversity, and human health [67, 68]. The higher nutrient use efficiency is generally reflected to be the adaptation of crops to a habitat with low soil N supply [69]. In the present study, fertilizer-N application at higher rate ( $N_{160}$ – $N_{240}$ ) significantly decreased the N use efficiencies over  $N_{120}$ . However, the K use efficiency did not differ significantly among different fertilizer-K application rates. These results corroborate earlier research findings of highest N use efficiency at the lower rate because of less losses [70, 71]. At the lower rate of fertilizer-N, the wheat plant mostly utilized the supplied N for grain yield. Hagos et al. [72] and Mesele [73] reported that that K use efficiency decreased when the rate of fertilizer-K application increases. The higher nutrient use efficiency was recorded at lower rates of fertilizer-N and K application in the present study. As reported by Bijay-Singh [74], if a unit of fertilizer to pay for its cost does not increase the yield, its use will not be economical. In addition, similar to the conclusion of Li et al. [75], the high fertilizer-N application rate (210 kg N ha<sup>-1</sup>) substantially decreased the N use efficiency compared to that at lower fertilizer-N application rate (52.5 kg N ha<sup>-1</sup>). Therefore, fertilizer-N use efficiency should be improved by farmers' to decrease the use of high fertilizer-N rate application. Generally,  $NO_3^-$ -N is the major source of soil N absorbed by crops [76] and the improvement of N recovery depend on the capture of by roots deep in the soil profile during the growing season [77]. Therefore, further research is looked-for to elucidate whether increasing N use efficiency through increasing utilization of residual soil  $NO_3^-$ -N [78]. In our study, decreasing wheat yield and N use efficiency at higher fertilizer-N application rates can result in large increase in tillering and biomass production [79] and decrease the vegetative growth of organs [80], increasing lodging [81], and parasite susceptibility [82]. Numerous researchers suggested that a balanced application of fertilization can improve nutrient use efficiency and reduce environmental impacts [10, 83, 84], and that the application of fertilizers (N, P and K) results in higher grain yields [30, 85, 86]. The interaction between K and N, especially available-N and K forms on plant growth and development, has become a focus of research. Our study showed that available-N forms affect plant growth and its uptake; however, the K rate has indirectly influence on the regulation of photosynthesis and nutrient absorption, with a positive N and K interaction effects. All the N use efficiency parameters declined with increase in N rate beyond  $N_{120}$ , suggesting the ideal management for higher wheat yield in this region. The increased plant dry weight and chlorophyll content is positively correlated with photosynthesis and plant growth [87]. It has been reported that application of fertilizer N in amounts more than that required to produce economic yields will lead to high N losses and low N use efficiencies [88]. The low N use efficiencies in our study suggest significant N losses or immobilization. The top dressing of fertilizer application probably resulted in much of the urea N being located on or near the soil surface,



with high potential for leaching and volatilization losses of N in this slightly alkaline coarse-textured soil.

Increasing synchronization between N needed by the crop and fertilizer N supply is crucial for improving N use efficiency. Applying N when demand by the crop is high will not only increase yield but also N use efficiency [89]. Ali et al. [90] reported that fertilizer N recovery efficiency in wheat in some parts of Egypt was in the range of 35.6–51.1% by following the standard recommendation. Worldwide N recovery efficiency in cereal is reported to be ~35% [2]. Improved AE and RE of applied N support the observations of Dobermann et al. [91] who regarded AE exceeding 25 kg grain per kg applied N and RE exceeding 60% with high grain yields as efficient N management strategies for timely sown wheat. Bijay-Singh et al. [92] reported wheat response to need based fertilizer N application at MT stage. The accurate yield prediction requires fundamental understanding of the functional relationship between yield and these interactive factors, and to reveal such relationship requires both comprehensive datasets and powerful Algorithms [93]. The crop models and decision tools have become a crucial element of precision agriculture in the world as a result of rapid development of advanced technologies [94]. Linear regression techniques, nonlinear simulations, expert systems, Adaptive Neuro fuzzy Interference System (ANFIS), Support Vector Machines (SVM), Data Mining (DM), Genetic Programming (GP), and Artificial Neural Network (ANN) are some of the prediction methods which are used in harvest predictions under the climate change [95–97]. Among these, ANNs have been applied to model complex non-linear relations [98], and have demonstrated the capability to handle a large number of inputs and generalize correlations [99]. The ANNs have been widely used for crop yield prediction with high range of accuracy [34, 98, 100, 101]. Crop yield forecasting plays an important role in farming planning and management, domestic food supply, international food trade, ecosystem sustainability, and so on [100, 102, 103]. Amaratunga et al. [98] used Levenberg–Marquardt, Bayesian Regularization, and Scaled Conjugated Gradient algorithms to train the developed ANN model for rice grain yield prediction in Sri Lanka. They reported that Levenberg–Marquardt training algorithm has outperformed the other two algorithms in determining the relationships between climatic factors and rice grain yield with less computational time. The results were stable and satisfactory under the highly unpredicted climate scenarios. ANN relationships developed can be used to predict the future rice grain yields based on climate data from various climate models. Khosla et al. [104] applied modular ANNs for predicting the amount of monsoonal rainfall and the crop yield potential of major *kharif* crops and reported that these machine learning approach has out-perform simulation abilities. Shastry et al. [101] compared ANNs and multiple linear regression (MLR) technique for predicting wheat grain yield based on amount of rainfall, crop biomass, soil evaporation, transpiration, soil moisture, and the amount of fertilizer-N applied to the crop. The customized ANN developed by varying the number of hidden layers and number of neurons in the hidden layer and the leaning rate had shown better performance for the prediction of wheat grain yield. Guo and Xue [34] reported high inaccuracy of the spatial neural network model in wheat yield forecasting which is limited to the forecasting of crop yield only within normal ranges. They reported that caution should be taken to use neural networks when using either Nonlinear Auto-regressive Neural Network (NARNN) and Nonlinear Autoregressive with External Input Neural Network (NARXNN) model for crop yield forecasting due to their inconsistency between the results of training and forecasting. Khaki and Wang [93] reported that deep neural network (DNN) approach had advantage of state-of-the-art modeling and solution techniques with superior prediction accuracy, with a RMSE being 12% of the average yield and 50% of the standard deviation for the validation data-set using predicted weather data. With perfect weather data, the RMSE would be reduced to 11% of the average yield and 46% of the standard deviation.

## 4. Materials and methods

### 4.1. Brief description of experimental site

A 2-year field experiment (2013–14 and 2014–15) on irrigated wheat was established in 2013 starting on a *Typic Ustochrept* sandy loam soil at the experimental farm of the Punjab Agricultural University, Ludhiana, Punjab (30°56'N and 75°52'E) in the Indo Gangetic Plains (IGPs) in the north-western region of India. The surface soil (0–15 cm) layer was non-saline (electrical conductivity E.C.<sub>1:2</sub> = 0.24 dS m<sup>-1</sup>) with pH<sub>1:2</sub> = 7.40 (1:2 soil: water), Walkley and Black-C = 3.46 g kg<sup>-1</sup>, available-N = 52.9 kg ha<sup>-1</sup>; 0.5 M NaHCO<sub>3</sub>-extractable P = 17.9 mg kg<sup>-1</sup> and 1 N NH<sub>4</sub>OAc-extractable K = 139.8 mg kg<sup>-1</sup>. The study region has a sub-tropical climate, with hot, wet summers and cold dry winters. Annual mean rainfall is ~760 mm, ~80% of which received in monsoon season extending between July and September. Mean minimum and maximum temperatures (averaged across 30 years) during wheat (November to April) are 6.7°C and 22.6°C and in rice (June to October) are 18°C and 35°C, respectively.

### 4.2. Experimental design and treatments

The experiment was laid out in a split plot design with three replications and consisted of six fertilizer-N application rates in main-plots and four rates of fertilizer-K rates in sub-plots. The main-plot treatments consisted of six fertilizer-N application rates of 0, 80, 120, 160, 200 and 240 kg N ha<sup>-1</sup> (N<sub>0</sub>-N<sub>240</sub>), and sub-plots treatments consisted of four fertilizer-K application rates of 0, 30, 60 and 90 kg K ha<sup>-1</sup> (K<sub>0</sub>-K<sub>90</sub>). These treatments were assigned to the same experimental plots in all the years of the study.

### 4.3. Fertilizer and irrigation management

Wheat crop received a different fertilizer-N (0, 80, 120, 160, 200 and 240 kg N ha<sup>-1</sup>) and K (0, 30, 60 and 90 kg K ha<sup>-1</sup>) rates as urea (46% N) and muriate of potash (60% K<sub>2</sub>O). One-third of total fertilizer-N, and whole amount of fertilizer-P and fertilizer-K were drilled at wheat sowing each year. The remaining ~2/3<sup>rd</sup> of fertilizer-N (as per treatment) was applied in two equal split doses immediately before first irrigation at 3 weeks and second irrigation applied at 8 weeks after sowing. Wheat was irrigated (~75 mm each) at crown root initiation, maximum tillering, panicle initiation and dough stages as recommended for the crop in the region.

### 4.4. Soil and plant analysis and estimation of nutrients use efficiencies

Soil samples from the surface (0–15 cm) soil layer were collected after the completion of two years study period. Soil samples were dried in shade and were ground and sieved through 2 mm stainless steel sieve, and stored in plastic bottles until analysis. Soil samples were analyzed for available-N and K. The grain and straw samples collected at maturity were oven-dried at 65°C for 48 h to a constant weight and ground to pass through a 0.5 mm screen. The total N and K contents were determined by micro-kjeldahl method and using flame photometry methods, respectively.

The partial factor productivity of K (PFP<sub>N</sub>/PFP<sub>K</sub>), agronomic efficiency of N and K (AE<sub>N</sub>/AE<sub>K</sub>), physiological efficiency of N and K (PE<sub>N</sub>/PE<sub>K</sub>) and the reciprocal internal use efficiency of N (RIUE<sub>N</sub>/RIUE<sub>K</sub>) were estimated using Eqs 9–16. The PFP was calculated as a ratio of grain yield (kg ha<sup>-1</sup>) and the total amount of fertilizer added (kg ha<sup>-1</sup>) using Eqs 9, 10. The AE was calculated a ratio of difference in grain yield (kg ha<sup>-1</sup>) in fertilizer-N and K added plots and the control (no-N/no-K) to the amount of fertilizer-N/fertilizer-K added (kg ha<sup>-1</sup>) using Eqs 11, 12. The PE was calculated as the ratio of difference in grain yield (total above-ground dry matter, kg ha<sup>-1</sup>) of fertilizer N/fertilizer-K applied and the control (no-N/no-K) to that of

difference in total (grain + straw) N and K uptake ( $\text{kg ha}^{-1}$ ) from fertilizer applied and the control (Eqs 13, 14). The  $\text{RIUE}_N$  of applied N and K was calculated as the ratio of N and K uptake ( $\text{kg ha}^{-1}$ ) by grain to the biological yield (total above-ground dry matter,  $\text{Mg ha}^{-1}$ ) (Eqs 15, 16).

$$\text{PFP}_N (\text{kg grain kg}^{-1} \text{ applied}) = \frac{\text{Grain yield (kg ha}^{-1}\text{)}}{\text{Total applied (kg ha}^{-1}\text{)}} \quad (9)$$

$$\text{AE}_{N/K} (\text{kg grains/kg N applied}) = \frac{(\text{Grain yield in } \frac{N}{K} \text{ fertilized plots})}{(\text{Amount of } \frac{N}{K} \text{ fertilizer applied})} \quad (10)$$

$$\text{PE}_{N/K} \left( \text{kg } \frac{\text{grains}}{\text{kg}} \text{ N/K uptake} \right) = \frac{(\text{Grain yield in N/K fertilized plots})}{(\text{Total N uptake in N/K fertilized plot uptake})} \quad (11)$$

$$\text{RIUE}_{N/K} (\text{kg Mg}^{-1} \text{ grain yield}) = \frac{\text{Uptake}_{(N/K)}}{\text{Grain yield}} \quad (12)$$

#### 4.5. Development of artificial neural network (ANN) model for prediction of wheat yield

The ANNs competent of learning the data-set used during the training step, and then validate and train the network with parts of the initial data set that is used during the training step [105–107]. The ANNs are collection of a large number of inter-connected neurons, which are helpful device to forecast the concert of a simulation system, when the availability of experimental data-set is limited [105]. The ANNs are multi-layered feed forward completely connected network consists of an input layer, one or more hidden layers and an output layer [105, 108]. In the present study, we applied back propagation neural networks technique, and ANNs consisted of several layers of neurons which are inter-connected and then the weights were assigned to those inter-connections [106]. To simply clarify, weighted connections will permit to move among the layers wherein a node will accept data from the earlier layer and will compute the weighted sum for the net inputs (Eq 13).

$$t_i = \sum_{j=1}^n (w_{ij}x_j + b_i) \quad (13)$$

Where, 'n' = actual number of inputs, 'w' = weight of the connection of the nodes that are 'i' and 'j', 'x' = input from 'j' and 'bi' = bias. The node outputs 'oi' was computed from the transfer function 'fi' using weighted values (Eq 14).

$$o_i = f_i(t_i) \quad (14)$$

In back propagation neural network, input layer neurons distribute input 'X<sub>i</sub>' to the weights 'w<sub>ij</sub><sup>h</sup>' of hidden layers without performing any computation. Outputs from hidden layer are computed in the first step and are passed by a following activation function (Eq 15).

$$Z_j = \partial_j \left( \sum_{i=1}^P W_{ij}^h + \gamma_j \right), j = 1, 2, 3, \text{den } m \quad (15)$$

Where, 'Z<sub>j</sub>' = activation function, '∂<sub>j</sub>' = non-linear activation function used in a hidden layer and could be a hyperbolic tangent, sigmoid or logistic function. 'P' = input number, 'h' = symbol for hidden layer and 'γ<sub>j</sub>' = j<sup>th</sup> error term.

The ANN forecasting model is formulated as Eq 16.

$$X_{t+T+(m-1)\Gamma}^F = f(X_t, w, \theta, m, h) = \theta_0 + \sum_{j=1}^h W_j^{out} \phi\left(\sum_{i=1}^m W_{ji} X_{t+(i-1)\Gamma+\theta_j}\right) \quad (16)$$

Where, ' $\phi$ ' is the transfer function, ' $W_{ji}$ ' = weights describing connections between the ' $i^{th}$ ' node of the input layer and the ' $j^{th}$ ' node of the hidden layer, ' $\theta_j$ ' = biases related to the hidden layer, ' $W_j^{out}$ ' = weights related to connection between the ' $j^{th}$ ' node of the hidden layer and node of the output layer and ' $\theta_0$ ' = bias at the output layer. Therefore, to apply Eq 14 for wheat yield prediction, a suitable training algorithm was required to optimize values of ' $w$ ' and ' $\theta$ '. In the present study, ANNs provided with Levenberg–Marquardt training algorithm and hyperbolic tangent sigmoid transfer functions was used as a point of reference to examine model inputs in terms of root mean square error (RMSE), mean absolute error (MAE) and mean absolute percentage error (MAPE).

To simulate wheat grain yield ( $\text{Mg ha}^{-1}$ ) of the experimental data-set, ten different input layers (viz. grain N uptake, straw N uptake, grain K uptake, straw K uptake, total N uptake, total K uptake, SPAD value, green seeker value,  $\text{RIUE}_N$  and  $\text{RIUE}_K$ ) were used as input variables. The wheat grain yield was chosen as desired output parameter. The experimental data (pooled for two study years) were randomly divided into two sets viz. training data set (70%) and testing data set (30%).

#### 4.6. Economic indices of wheat production

The mean cost of cash inputs (MCCIs) was estimated as sum of expenditure incurred for the purchase of inputs ( $\text{US\$ ha}^{-1}$ ), e.g., seed, fertilizers, insecticides, fungicides, herbicides, etc. and labor cost for different field operations (Eq 17).

$$\text{MCCIs}(\text{US\$ ha}^{-1}) = \sum C_{1,2,3,\dots,n} \quad (17)$$

Where  $C_{1,2,3,\dots,n}$  represents cost for different inputs and labor.

The mean gross returns (MGRs) were estimated as a product of grain yield ( $\text{Mg ha}^{-1}$ ) under different treatments and minimum support price (MSP) of produce (rice, wheat) fixed by Government of India ( $\text{US\$ Mg}^{-1}$ ) (Eq 18).

$$\text{MGR}(\text{US\$ ha}^{-1}) = \text{Grain yield} \times \text{MSP} \quad (18)$$

Mean net returns (MNR) were estimated as the difference in MGR and MCCI (Eq 19).

$$\text{MNRs}(\text{US\$ ha}^{-1}) = \text{MGRs} - \text{MCCIs} \quad (19)$$

MCCIs, MGRs and MNRs were computed by converting Indian Rupee (INR) to United States Dollar (US\$), considering  $1\text{US\$} = 70\text{INR}$ .

The benefit-cost (B-C) ratio was estimated as a ratio of MGRs and the MCCIs. The gross returns above the fertilizer cost (GRAFC) for wheat were estimated as the difference in between MGRs and amount (A) of N, P and K applied ( $\text{kg ha}^{-1}$ ) and price of N, P and K ( $\text{US\$ kg}^{-1}$ ) as per treatment (Eq 20).

$$\text{GRAFC}(\text{US\$ ha}^{-1}) = [\text{MGRs}] - [A_{(N+P+K)} \times \text{price}_{(N+P+K)}] \quad (20)$$

Where, ' $A_{(N+P+K)}$ ' represents amount of N+P+K applied and ' $\text{price}_{(N+P+K)}$ ' represents the market price of N+P+K. These estimations were based on market price of  $\text{US\$ } 84.4$  and  $242.9\text{Mg}^{-1}$  for urea and MOP, respectively.

The economic efficiency was determined by dividing average net returns (ANR, US\$ ha<sup>-1</sup>) from crop under different fertilizer treatments by crop duration (d) (Eq 21).

$$\text{Economic efficiency (US\$ ha}^{-1}\text{d}^{-1}) = \frac{\text{Mean net returns (MNRs)}}{\text{Mean crop duration}} \quad (21)$$

The returns on investment (ROI) on fertilizers were estimated as a ratio of MGRs and total cost of fertilizers using Eq 22.

$$\text{ROI (US\$ ha}^{-1}) = \frac{\text{MGRs (US\$ ha}^{-1})}{\text{Total cost of fertilizers (US\$ kg}^{-1})} \quad (22)$$

#### 4.7. Statistical analysis

The data were analyzed using analysis of variance for the split plot design. All data-sets were analyzed using analysis of variance (ANOVA) and the differences between the means of treatment were separated by the least significant difference at the level of significance  $p < 0.05$  using IRRISTAT package [109]. The correlation matrix was developed in R software (R core team 2013). The step-wise multiple regression analysis was performed with SPSS 22.0 for Windows (IBM SPSS Inc., Chicago, U.S.A.). To develop ANN model for the prediction of wheat grain yield, MATLAB M-File environment version of MATLAB (R2017a, 9.2.0.538062) was used and program was written and run with Levenberg Marquardt algorithm. The statistical parameters viz. coefficient of determination ( $R^2$ ), RMSE, MAE and MAPE were calculated using following equations (Eqs 23–26). The correspondence between the measured and predicted root biomass of rice and wheat was graphically shown using 1:1 correspondence ( $X = Y$ ).

$$R^2 = 1 - \left( \frac{\sum (t_i - z_i)^2}{\sum t_i^2} \right) \quad (23)$$

$$\text{MAE} = \frac{\sum |t_i - z_i|}{n} \quad (24)$$

$$\text{RMSE} = \sqrt{\frac{\sum (t_i - z_i)^2}{n}} \quad (25)$$

$$\text{MAPE} = \frac{1}{n} \sum \left| \frac{t_i - z_i}{t_i} \right| \times 100 \quad (26)$$

Where, 'n' = number of data points in the data set and 't' = actual output, 'z' = predicted output. The significance of regression coefficients (slope and intercept) and coefficient of determination ( $R^2$ ) was tested using students' T and F-test, respectively.

#### 5. Conclusions

Higher N fertilizer application ensured higher crop yield and N accumulation, cause potential N losses and pollute source, but was not necessary to achieve optimal crop production. However, an increase in N supply did not affect the grain yield by increased K fertilization under sufficient available-K content in illitic soils. The higher rate of N and K fertilizer application decreased nutrient use efficiencies and fertilizer productivity. It is essential to increase NUE by reducing the input of N fertilizer and increasing the N absorption of crops, and to improve the sustainability of crop production. This study would help policy makers consider artificial



neural network model and economic indices of wheat production suitable for up-scaling and large-scale adoption by smallholder farmers.

## Acknowledgments

Authors would like to extend their sincere appreciation to the Researchers Supporting Project number (RSP- 2021/347), King Saud University, Riyadh, Saudi Arabia.

## Author Contributions

**Conceptualization:** Sandeep Sharma, Gagandeep Kaur.

**Data curation:** Sandeep Sharma, Pritpal Singh.

**Formal analysis:** Sandeep Sharma, Gagandeep Kaur, Pritpal Singh.

**Funding acquisition:** Saud Alamri.

**Investigation:** Sandeep Sharma.

**Methodology:** Sandeep Sharma, Gagandeep Kaur.

**Resources:** Manzer H. Siddiqui.

**Validation:** Pritpal Singh.

**Visualization:** Pritpal Singh.

**Writing – original draft:** Sandeep Sharma, Saud Alamri, Ritesh Kumar, Manzer H. Siddiqui.

**Writing – review & editing:** Saud Alamri, Ritesh Kumar, Manzer H. Siddiqui.

## References

1. Reddy G. B. & Reddy K.R. (1993). Fate of nitrogen-15 enriched ammonium nitrate applied to corn. *Soil Science Society of American Journal*, 57, 111–115.
2. Omara P., Aula L., Oyebiyi F. & Raun W.R. (2019) World cereal nitrogen use efficiency trends: review and current knowledge. *Agrosystem, Geoscience & Environment*, 2, 1–8.
3. Lerner S.E., Cogliatti M., Ponzio N.R., Seghezzo M.L., Molfese E.R. & Rogers W.J. (2004) Genetic variation for grain components and industrial quality of durum wheat cultivars sown in Argentina. *Journal of Cereal Science*, 40, 161–166.
4. Edwards N.M., Gianibelli M.C., McCaig T.N., Clarke J.M., Ames N.P., Larroque O.R. et al. (2007). Relationship between dough strength, polymeric protein quantity and composition for diverse durum wheat genotypes. *Journal of Cereal Science*, 45, 140–149.
5. López-Bellido L., López-Bellido R. J. & Redondo R. (2005) Nitrogen efficiency in wheat under rainfed Mediterranean conditions as affected by split nitrogen application. *Field Crops Research*, 94, 86–97.
6. Yang X., Li Y., Ren B., Ding L., Gao C., Shen Q. et al. (2012) Drought-induced root aerenchyma formation restricts water uptake in rice seedlings supplied with nitrate. *Plant & Cell Physiology*, 53, 495–504. <https://doi.org/10.1093/pcp/pcs003> PMID: 22257489
7. Ding L., Gao C, Yingrui L., Li Y., Zhu Y., Xu G., et al. (2015) The enhanced drought tolerance of rice plants under ammonium is related to aquaporin (AQP). *Plant Science*, 234, 14–21. <https://doi.org/10.1016/j.plantsci.2015.01.016> PMID: 25804805
8. Fageria N. K. (2014) Nitrogen Management in Crop Production. CRC Press, New York 2014.
9. Sharma S., Singh P., Choudhary O.P., Neemisha. (2021) Nitrogen and rice straw incorporation impact nitrogen use efficiency, soil nitrogen pools and enzyme activity in rice-wheat system in north-western India. *Field Crops Research*, 266, 108–131.
10. Singh P., Benbi D.K., Verma G. (2021) Nutrient management impacts on nutrient use efficiency and energy, carbon, and net ecosystem economic budget of rice-wheat cropping system in north-western India. *Journal of Soil Science & Plant Nutrition*, 21, 559–577.

11. Dobermann A. (2007) Nutrient use efficiency—measurement and management. In International Fertilizer Industry Association (IFA) (Eds.) IFA International Workshop on Fertilizer Best Management Practices. IFA, Paris, pp. 1–28.
12. Brennan R.F. & Bolland M.D.A. (2009) Comparing the nitrogen and potassium requirements of canola and wheat for yield and grain quality. *Journal of Plant Nutrition*, 32, 2008–2026.
13. Mengel K. & Kirkby E.A. (1987) Principles of plant nutrition (4<sup>th</sup> edn). Bern: International Potash Institute.
14. Singh P., Saini S.P. & Matharu G.S. (2011) Effect of potassium application on yield, efficiency and economics in irrigated sub-tropical soils under rice-wheat cropping sequence—An on-farm experience. *Research on Crops (An International Journal)*, 12, 263–268.
15. Von Pinho R.G., Borges I. D., De Andrade Rezende Pereira J. L. & Dos Reis M.C. (2009) Macronutrients absorption and dry matter accumulation in maize. *Revista Brasileira de Milho e Sorgo (in Portuguese)*, 8, 153–173.
16. Bender R.R., Haegerle J.W., Ruffo M.L. & Below F.E. (2013) Nutrient uptake, partitioning, and remobilization in modern, transgenic insect-protected maize hybrids. *Agronomy Journal*, 105, 161–170.
17. Marschner P. (2012) Mineral Nutrition of Higher Plants, 3rd Edn. Academic Press, London, pp. 178–189.
18. Erel R., Yermiyahu U., Ben-Gal A., Dag A., Shapira O. & Schwartz A. (2015) Modification of non-stomatal limitation and photoprotection due to K and Na nutrition of olive trees. *Journal of Plant Physiology*, 177, 1–10. <https://doi.org/10.1016/j.jplph.2015.01.005> PMID: 25659331
19. Zhang H., Xu M., Shi X., Li Z., Huang Q. & Wang X. (2010) Rice yield, potassium uptake and apparent balance under long-term fertilization in rice based cropping systems in southern China. *Nutrient Cycling in Agroecosystem*, 88, 341–349.
20. Zhao S., He P., Qiu S., Jia L., Liu M., Jin J. et al. (2014) Long-term effects of potassium fertilization and straw return on soil potassium levels and crop yields in north-central China. *Field Crops Research*, 169, 116–122.
21. Li X., Cai J., Li H., Bo Y., Liu F., Jiang D., et al. (2012) Effect of shading from jointing to maturity on high molecular weight glutenin subunit accumulation and glutenin macropolymer concentration in grain of winter wheat. *Journal of Agronomy & Crop Science*, 198, 68–79.
22. Vitousek P. M., Aber J. D., Howarth R. W., Likens G. E., Matson P. A., Schindler D. W., Schlesinger W. H., & Tilman D. G. (1997) Human alteration of the global nitrogen cycle: Sources and consequences. *Ecological Applications*, 7, 737–750.
23. Singh Y., Singh B. & Timsina J. (2005) Crop residue management for nutrient cycling and improving soil productivity in rice-based cropping systems in the tropics. *Advances in Agronomy*, 85, 269–407.
24. Farmaha B.S., Singh P. & Singh B. (2021) Spatial and temporal assessment of nitrate-N under rice-wheat system in riparian wetlands of Punjab, north-western India. *Agronomy*, 11, 1284.
25. Ju X. T., Xing G.X., Chen X.P., Zhang L.J., Liu X., Cui Z.L., et al. (2009) Reducing environmental risk by improving N management in intensive Chinese agricultural systems. *Proceedings of National Academy of Science USA*, 106, 3041–3046 <https://doi.org/10.1073/pnas.0813417106> PMID: 19223587
26. Singh B., Singh Y., Imas P. & Jian-Chang X. (2004) Potassium nutrition of the rice-wheat cropping system. *Advances in Agronomy*, 81, 203–259.
27. Saha P.K., Hossain A.T.M.S. & Miah M.A.M. (2010) Effect of potassium application on wheat (*Triticum aestivum* L.) in old Himalayan piedmont plain. *Bangladesh Journal of Agricultural Research*, 35, 207–216.
28. Raun W.R. & Johnson G.V. (1999) Improving nitrogen use efficiency for cereal production. *Agronomy Journal*, 91, 357–363.
29. Dhillon J., Eickhoff E.M., Mullen R.W. & Raun W.R. (2019) World potassium use efficiency in cereal crops. *Agronomy Journal*, 111, 1–8.
30. Duncan E.G., O'Sullivan C.A., Roper M.M., Biggs J.S. & Peoples M.B. (2018) Influence of co-application of nitrogen with phosphorus, potassium and sulphur on the apparent efficiency of nitrogen fertiliser use, grain yield and protein content of wheat: review. *Field Crops Research*, 226, 56–65.
31. Lobell D. B., Cassman K. G. & Field C. B. (2009) Crop yield gaps: Their importance, magnitudes, and causes. *Annual Review of Environment & Resources*, 34, 179–204.
32. Sharma S., Singh P., Kaur S. & Singh Y. (2021) Yield, potassium use efficiency and potassium fractions with long-term nitrogen fertilization and rice straw incorporation in the rice-wheat cropping system in north-western India. *Communication in Soil Science & Plant Analysis*, 53, 793–813.
33. Zhao B.Q., Li X.Y., Li X.P., Shi X.J., Huang S.M., Wang B.R., et al (2010) Long-term fertilizer experiment network in China: crop yields and soil nutrient trends. *Agronomy Journal*, 102, 216–230.

34. Guo W.W. & Xue H. (2014) Crop yield forecasting using artificial neural networks: A comparison between spatial and temporal models. *Mathematical Problems in Engineering*. <https://doi.org/10.1155/2014/857865>
35. Mohammed Y.A., Kelly J., Chim B.K., Rutto E., Waldschmidt K., Mullock J., et al. (2013) Nitrogen fertilizer management for improved grain quality and yield in winter wheat in Oklahoma. *Journal of Plant Nutrition*, 36, 749–761.
36. Farmaha B.S., Sims A.L. & Wiersma J.J. (2015) Impact of nitrogen fertility on the production performance of four hard red spring wheat cultivars. *Agronomy Journal*, 107, 864–870.
37. Corassa G.M., Hansel F.D., Lollato R., Pires J.L.F., Schwalbert R., Amado T.J.C., et al. (2018) Nitrogen management strategies to improve yield and dough properties in hard red spring wheat. *Agronomy Journal*, 110, 1–13.
38. Duncan E.G., O'Sullivan C.A., Roper M.M., Palta J., Whisson K. & Peoples M.B. (2018) Yield and nitrogen use efficiency of wheat increased with root length and biomass due to nitrogen, phosphorus, and potassium interactions. *Journal of Plant Nutrition & Soil Science*, 181, 364–373.
39. Girma K., Holtz S.L., Arnall D.B., Fultz L.M., Hanks T.L., Lawles K.D. et al. (2007) Weather, fertilizer, previous year yield, and fertilizer levels affect ensuing year fertilizer response of wheat. *Agronomy Journal*, 2007, 99, 1607–1614.
40. Bundy L.G. & Andraski T.W. (2004) Diagnostic tests for site-specific nitrogen recommendation for winter wheat. *Agronomy Journal*, 96, 608–614.
41. Anjana S.U.; Iqbal M. Effect of applied potassium in increasing the potential for N assimilation in spinach (*Spinacea oleracea* L.). *Elec. Int. Ferti. Corresp.*, 2009, 20, 8–10.
42. Hu W., Jiang N., Yang J., Meng Y., Wang Y. & Chen B. (2016) Potassium (K) supply affects K accumulation and photosynthetic physiology in two cotton (*Gossypium hirsutum* L.) cultivars with different K sensitivities. *Field Crops Research*, 196, 51–63.
43. Shaviv A. & Hagin J. (1988) Interaction of ammonium and nitrate nutrition with potassium in wheat. *Fertility Research*, 17, 137–146
44. Schröder J.J., Scholefield D., Cabralet F. & Hofmanal G. (2004). The effects of nutrient losses from agriculture on ground and surface water quality: The position of science in developing indicators for regulation. *Environmental Science & Policy*, 7, 15–23.
45. Hussain M.I. & Shah S.H. (2002) Growth, yield and quality response of three wheat varieties to different levels of N, P and K. *International Journal of Agriculture & Biology*, 4, 362–364
46. Amare T.A., Terefe Y.G., Selassie B., Yitaferu B.W. & Hurni H. (2013) Soil properties and crop yields along the terraces and toposequence of Anjeni Watershed, Central Highlands of Ethiopia. *Journal of Agricultural Sciences*, 5, 134–144.
47. Cai T., Xua H., Penga D., Yina Y. Yanga W. Ni Y., et al. Exogenous hormonal application improves grain yield of wheat by optimizing tiller productivity. *Field Crops Research*, 155, 172–183
48. Hucl P. & Baker R.J. (1991) Performance of oligoculm spring wheats grown in a semiarid environment. *Canadian Journal of Plant Science*, 71, 199–203.
49. Çakmak G. & Yıldız C. (2011) The prediction of seedy grape drying rate using a neural network method. *Computers & Electronics in Agriculture*, 75, 132–38.
50. Zahoor R., Zhao W., Abid M., Dong H. & Zhou Z. (2017) Potassium application regulates nitrogen metabolism and osmotic adjustment in cotton (*Gossypium hirsutum* L.) functional leaf under drought stress. *Journal of Plant Physiology*, 215, 30–38 <https://doi.org/10.1016/j.jplph.2017.05.001> PMID: 28527336
51. Agegnehu G., Nelson P. N. & Bird M. I. (2016) The effects of biochar, compost and their mixture and nitrogen fertilizer on yield and nitrogen use efficiency of barley grown on a Nitisol in the highlands of Ethiopia. *Science of Total Environment*, 569, 869–879. <https://doi.org/10.1016/j.scitotenv.2016.05.033> PMID: 27288288
52. Kong L., Xie Y., Hu L., Si J. & Wang Z. (2017) Excessive nitrogen application dampens antioxidant capacity and grain filling in wheat as revealed by metabolic and physiological analyses. *Scientific Reports*, 7, 43363 <https://doi.org/10.1038/srep43363> PMID: 28233811
53. Borghi B. (1999) Nitrogen as determinant of wheat growth and yield. Wheat: Ecology and physiology of yield determination. In Satorre E.H. and Sialfer G.A. (Eds.): Food Products Press, New York.
54. Grant C.A., O'Donovan J.T., Blackshaw R.E., Harker K.N., Johnson E.N., Gan Y., et al. (2016) Residual effects of preceding crops and nitrogen fertilizer on yield and crop and soil N dynamics of spring wheat and canola in varying environments on the Canadian prairies. *Field Crops Research*, 192, 86–102.
55. Abebe Z & Feyisa H. (2017) Effects of nitrogen rates and time of application on yield of maize: rainfall variability influenced time of N application. *International Journal of Agronomy*, 1–10.

56. Hundal L.S. & Pasricha N.S. (1993) Non-exchangeable potassium release kinetics in illitic soil profiles. *Soil Science*, 156, 34–41.
57. Hundal H.S., Singh D., Singh K. & Kumar R. (2009) Contribution of nutrients through the well irrigation water to wheat and rice in different landform zones of Punjab. *Journal of Indian Society of Soil Science*, 57, 97–99.
58. Donovan J.L., Paramasivan S., de Salis Isabel & Toerien M. (2014) Clear obstacles and hidden challenges: understanding recruiter perspectives in six pragmatic randomised controlled trials. *Trials Journal*, 15, 5. <https://doi.org/10.1186/1745-6215-15-5> PMID: 24393291
59. Glendinning M.J., Powlson D.S., Poulton P.R., Bradbury N.J., Palazzo D & Li X (1996) The effects of long-term applications of inorganic nitrogen fertilizer on soil nitrogen in the Broadbalk wheat experiment. *Journal of Agricultural Science*, 127, 347–363.
60. Lloveras J., Ferran J., Boixadera J. & Bonet J. (2001) Potassium fertilization effects on alfalfa in a Mediterranean climate. *Agronomy Journal*, 93, 139–143.
61. Deng Y., Li C., Shao Q., Ye X. & She J. (2012) Differential responses of double petal and multi petal jasmine to shading: I. Photosynthetic characteristics and chloroplast ultrastructure. *Plant Physiology & Biochemistry*, 55, 93–102. <https://doi.org/10.1016/j.plaphy.2012.03.006> PMID: 22562019
62. Cui H., Camberato J. J., Jin L. & Zhang J. (2015) Effects of shading on spike differentiation and grain yield formation of summer maize in the field. *International Journal of Biometeorology*, 59, 1189–1200. <https://doi.org/10.1007/s00484-014-0930-5> PMID: 25380975
63. Schlichting A.F., Bonfim-silva E.M., Silva M.D.C., Pietro-souza W., Silva T.J.A. & Farias L.N. (2015) Efficiency of portable chlorophyll meters in assessing the nutritional status of wheat plants. *Revista Brasileira de Engenharia Agrícola Ambiental*, 19 (12). <https://doi.org/10.1590/1807-1929/agriambi.v19n12p1148-1151>
64. Lailiberte A.S., Rango A., Herrick J.E., Fredrickson Ed. L. & Burkett L. (2007) An object-based image analysis approach for determining fractional cover of senescent and green vegetation with digital plot photography. *Journal of Arid Environment*, 69, 1–14.
65. Mauro R.P., Occhipinti A., Longo A.M.G. & Mauromicale G. (2011) Effects of shading on chlorophyll content, chlorophyll fluorescence and photosynthesis of subterranean clover. *Journal of Agronomy & Crop Science*, 197, 57–66.
66. Teixeira Filho M.C.M., Buzetti S., Andreotti M., Arf O., & Benett C.G.S. (2010) Nitrogen sources in coverage of two wheat cultivars on remnants of winter maize crop. *Pesquisa Agropecuária Brasileira*, 45: 797–804
67. Galloway J.N., Townsend A.R., Erisman J.W., Bekunda M., Cai Z., Freney J.R., et al. (2008) Transformation of the nitrogen cycle: Recent trends, questions, and potential solutions. *Science*, 320, 889–92. <https://doi.org/10.1126/science.1136674> PMID: 18487183
68. Yang X., Zeng Y., Qiu X. & Jiang A. (2005) The climatic change of global solar radiation over the Yellow River Basin during 1960–2000. *Journal of Applied Meteorological Science*, 16, 243–248.
69. Chapin F.S. (1980) The mineral nutrition of wild plants. *Annual Reviews of Ecology & Systematics*, 11, 233–260
70. Fageria N.K. & Baligar V.C. (2005) Enhancing nitrogen use efficiency in crop plants. *Advances in Agronomy*, 88, 97–185.
71. Solomon W. & Anjulo A. (2017) Response of bread wheat varieties to different levels of nitrogen at Doyogena, Southern Ethiopia. *International Journal of Scientific Research Publication*, 7, 452–459
72. Hagos B., Tekalign M. & Kassa T. (2017) Optimum potassium fertilization level for growth, yield and nutrient uptake of wheat (*Triticum aestivum*) in Vertisols of Northern Ethiopia. *Cogent Food & Agriculture*, 3(1), 1–8. <https://doi.org/10.1080/23311932.2017.1347022>
73. Mesele A. (2019) Productivity, nutrient uptake and use efficiency of wheat as affected by Pan K level. M.Sc. Thesis Wolaita Sodo University Ethiopia,
74. Bijay-Singh (2018) Are nitrogen fertilizers deleterious to soil health. *Agronomy* 8, 48, <https://doi.org/10.3390/agronomy8040048>
75. Li Q., Zhong S., Sun S., Fatima S. A., Zhang M., Chen W., Huang Q., et al. (2017) Differential effect of whole-ear shading after heading on the physiology, biochemistry and yield index of stay-green and non-stay-green wheat genotypes. *PloS One*, 12, e0171589. <https://doi.org/10.1371/journal.pone.0171589> PMID: 28158297
76. Yuan F., Kali E., Sawaya Brian C. & Loeffelholz Marvin E. (2005) Bauer land cover classification and change analysis of the Twin Cities (Minnesota) Metropolitan Area by multitemporal Landsat remote sensing. *Remote Sensing of Environment*, 98, 317–328.



77. Crews T. & Peoples M. (2005) Can the synchrony of nitrogen supply and crop demand be improved in legume and fertilizer-based agroecosystems? *A Review. Nutrient Cycling in Agroecosystems*, 72, 101–120.
78. Kaur B., Kaur G. & Asthir B. (2017) Biochemical aspects of nitrogen use efficiency: An overview. *Journal of Plant Nutrition*, 40, 506–523.
79. Van- Herwaarden A. F., Farquhar G. D., Angus J.F., Richards R. A. & Howe G. N. (1998) 'Haying-off', the negative grain yield response of dryland wheat to nitrogen fertiliser. I. Biomass, grain yield, and water use. *Australian Journal of Agricultural Research*, 49, 1067–1081.
80. Brady N. C. (1990) The nature and properties of soils. Macmillan Company, New York, USA, 87–90.
81. Lollato R. P. & Edwards J. T. (2015) Maximum attainable wheat yield and resource-use efficiency in the southern great plains. *Crop Science*, 55, 2863–2876.
82. Howard D., Chambers A. & Logan J. (1994) Nitrogen and fungicide effects on yield components and disease severity in wheat. *Journal of Production Agriculture*, 7, 446–454.
83. Zhu Z.L. & Chen D.L. (2002) Nitrogen fertilizer use in China contributions to food production, impacts on the environment and best management strategies. *Nutrient Cycling in Agroecosystem*, 63, 117–127.
84. Niu J., Zhang W. Ru S. Chen X., Xiao K., Zhang X., et al (2013) Effects of potassium fertilization on winter wheat under different production practices in the North China Plain. *Field Crops Research*, 140, 69–76. <https://doi.org/10.1016/j.fcr.2012.10.008>
85. Aulakh M.S. & Malhi S.S. (2005) Interactions of nitrogen with other nutrients and water: Effect on crop yield and quality, nutrient use efficiency, carbon sequestration and environmental pollution. *Advances in Agronomy*, 86, 341–409.
86. Xin X.L., Qin S.W., Zhang J.B., Zhu A.N., Yang W.L. & Zhang X.F. (2017) Yield, phosphorus use efficiency and balance response to substituting long-term chemical fertilizer use with organic manure in a wheat-maize system. *Field Crops Research*, 208, 27–35.
87. Arumugam R., Rajasekaran S. & Nagarajan S.M. (2011) Response of Arbuscular mycorrhizal fungi and Rhizobium inoculation on growth and chlorophyll content of *Vigna unguiculata* (L) Walp Var. Pusa 151. *Journal of Applied Sciences & Environmental Management*, 14.
88. Fageria N.K., Baligar V.C. & Li Y.C. (2008) The role of nutrient efficient plants in improving crop yields in the twenty first century. *Journal of Plant Nutrition*, 31, 1121–1157
89. Diacono M., Castrignanò A., Troccoli A., De Benedetto D., Basso B. & Rubino P. (2012) Spatial and temporal variability of wheat grain yield and quality in a Mediterranean environment: a multivariate geostatistical approach. *Field Crops Research*, 131, 49–62.
90. Ali A.M., Ibrahim S. & Fawy H. (2017) Soil-based technique for managing nitrogen fertilization in wheat in some desert soils at West Nile Delta, Egypt. *Alexandria Science Exchange Journal*, 38, 699–706.
91. Dobermann A., Ping J.L., Adamchuk V.I., Simbahan G.C. & Ferguson R.B. (2003) Classification of Crop Yield Variability in Irrigated Production Fields. *Agronomy Journal*, 95, 1105
92. Singh B., Singh Y., Ladha J.K., Bronson K.F., Balasubramanian V., Singh J. et al (2002) Chlorophyll meter—and leaf color chart—based nitrogen management for rice and wheat in Northwestern India. *Agronomy Journal*, 94, 821–829
93. Khaki S. & Wang L. (2019) Crop yield prediction using deep neural networks. *Front. Plant Sciences*, 10:621. <https://doi.org/10.3389/fpls.2019.00621> PMID: 31191564
94. Chary S., Mustaffha S. & Ismail W. I. W. (2019) Determining the yield of the crop using artificial neural network method. *International Journal of Engineering and Advanced Technology*, 9, 2959–2965.
95. Gopal P.S.M. & Bhargavi R. (2019) Novel approach for efficient crop yield prediction. *Computers and Electronics in Agriculture*, 165, 104968.
96. Gopal P.S.M.; Bhargavi R. (2019) Performance evaluation of best feature subsets for crop yield prediction using machine learning algorithms. *Applications of Artificial Intelligence*, 33, 621–642.
97. Adisa I.O., Pullagurala V.L.R., Peralta-Videa J.R., Dimkpa C.O., Elmer W.H., Gardea-Torresdey J.L. et al. (2019) Recent advances in nano-enabled fertilizers and pesticides: a critical review of mechanisms of action. *Environmental Science Nano Journal*, 6, 2002–2030.
98. Amaratunga V., Wickramasinghe L., Perera A., Jayasinghe J. & Rathnayake U. (2020) Artificial neural network to estimate the paddy yield prediction using climatic data. *Mathematical Problems in Engineering*. <https://doi.org/10.1155/2020/8627824>.
99. Haykin S (1999) Neural Networks: A Comprehensive Foundation (Second Edition). Upper Saddle River, NJ: Prentice Hall.
100. Green T.R., Salas J.D., Martinez A. & Erskine R.H. (2007) Relating crop yield to topographic attributes using spatial analysis neural networks and regression. *Geoderma*, 139, 23–37



101. Shastry K.A., Sanjay H.A. & Deshmukh A. (2016) A parameter based customized artificial neural network model for crop yield prediction. *Journal of Artificial Intelligence*, 9, 23–32.
102. Jame Y.W. & Cutforth H.W. (1996) Crop growth models for decision support systems. *Canadian Journal of Plant Science*, 76, 9–19.
103. Tao Y., Zhang S., Jian W., Yuan C. & Shan X. (2006) Effects of oxalate and phosphate on the release of arsenic from contaminated soils and arsenic accumulation in wheat. *Chemosphere*, 65, 1281–1287. <https://doi.org/10.1016/j.chemosphere.2006.04.039> PMID: 16750554
104. Khosla E., Dharavath R. & Priya R. (2019) Crop yield prediction using aggregated rainfall-based modular artificial neural networks and support vector regression. *Environment, Development & Sustainability*, <https://doi.org/10.1007/s10668-019-00445-x>.
105. Najafi G., Ghobadian B., Tavakoli T., Buttsworth D.R., Yusaf T.F. & Faizollahnejad M. (2009) Performance and exhaust emissions of a gasoline engine with ethanol blended gasoline fuels using artificial neural network. *Applied Energy*, 86, 630–39.
106. Cao H., Wang Z., He G., Dai J., Huang M., Wang S., et al. (2017) Tailoring NPK fertilizer application to precipitation for dryland winter wheat in the Loess Plateau. *Field Crops Research*, 209, 88–95
107. Singh P. & Benbi D.K. (2022) Nutrient management effects on carbon input through root and shoot biomass in a rice-wheat system. *Agricultural Research Journal*, (Accepted).
108. Khairunniza-Bejo S., Mustaffa S. & Ismail W.I.W. (2014) Application of artificial neural network in predicting crop yield: a review. *Journal of Food Science & Engineering*, 4, 1.
109. International Rice Research Institute (IRRI) (2000) IRRISTAT for window (CD-ROM) version 4.02b. Los Banos, Philippines, IRRI
